# Supplementary material for: Genetic Rescue of X-Linked Retinoschisis Mouse (Rs1−/y) Retina Induces Quiescence of the Retinal Microglial Inflammatory State Following AAV8-RS1 Gene Transfer and Identifies Gene Networks Underlying Retinal Recovery
Source: PubMed Central journal article supplement (PMC8312029; doi:10.1089/hum.2020.213), 2021-07-16
Supplement: Supp_Fig2.pdf [file Supp_Fig2.pdf]

**Figure S2. Differentially Expressed Genes**

**P21-Rs1-KO vs. WT**

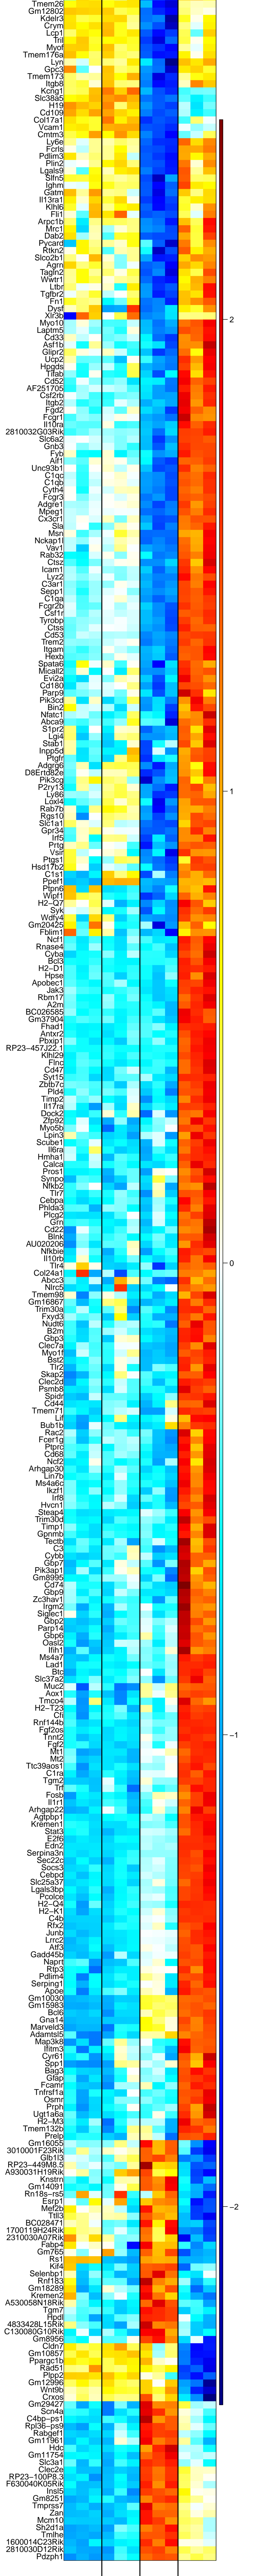

P21.WT.1 P21.WT.2 P21.WT.3 P21.KO.1 P21.KO.2 P21.KO.3 P21.WT.1 P21.WT.2 P21.WT.3 P21.KO.1 P21.KO.2 P21.KO.3
