# Supplementary material for: Genetic Rescue of X-Linked Retinoschisis Mouse (Rs1−/y) Retina Induces Quiescence of the Retinal Microglial Inflammatory State Following AAV8-RS1 Gene Transfer and Identifies Gene Networks Underlying Retinal Recovery
Source: PubMed Central journal article supplement (PMC8312029; doi:10.1089/hum.2020.213), 2021-07-16
Supplement: Supp_Fig4.pdf [file Supp_Fig4.pdf]

Figure S4. Transgene *RS1* induced gene expression changes G7 vs. C7 and G35 vs. C35 retinas (q RT-PCR confirmation)

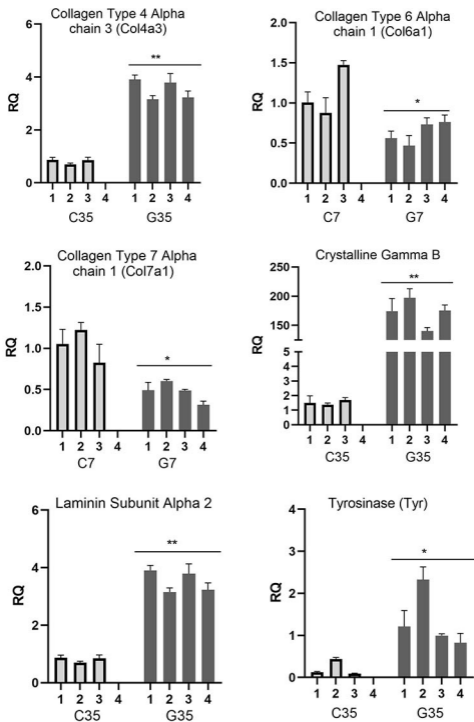

The experimental conditions are described in Figure S3.

\*  $p < 0.05$ ; \*\*  $p < 0.001$
