# Supplementary material for: Genetic Rescue of X-Linked Retinoschisis Mouse (Rs1−/y) Retina Induces Quiescence of the Retinal Microglial Inflammatory State Following AAV8-RS1 Gene Transfer and Identifies Gene Networks Underlying Retinal Recovery
Source: PubMed Central journal article supplement (PMC8312029; doi:10.1089/hum.2020.213), 2021-07-16
Supplement: Supp_Table1.pdf [file Supp_Table1.pdf]

**Table S1. The number of sequencing reads generated for each sample and their alignment statistics**

| <b>Sample</b> | <b>Annotation</b> | <b>% Annotation</b> | <b>Genome</b> | <b>% Genome</b> | <b>Total Depth</b> |
|---------------|-------------------|---------------------|---------------|-----------------|--------------------|
| P12 WT 1      | 41,052,774        | 83.9                | 46,577,438    | 95.2            | 48,923,036         |
| P12 WT 2      | 35,231,979        | 85.5                | 39,159,111    | 95.1            | 41,194,548         |
| P12_WT_3      | 40,763,850        | 85.7                | 46,103,182    | 97.0            | 47,542,843         |
| P12 KO 1      | 40,609,231        | 86.3                | 45,566,316    | 96.8            | 47,052,159         |
| P12 KO 2      | 40,980,476        | 86.6                | 46,074,661    | 97.4            | 47,309,482         |
| P12 KO 3      | 39,629,420        | 87.0                | 44,358,998    | 97.3            | 45,575,240         |
| P21 WT 1      | 43,658,296        | 79.8                | 52,610,761    | 96.2            | 54,713,454         |
| P21 WT 2      | 34,111,976        | 81.6                | 40,459,476    | 96.8            | 41,813,069         |
| P21_WT_3      | 33,674,896        | 81.6                | 40,047,749    | 97.1            | 41,249,999         |
| P21 KO 1      | 45,576,264        | 83.2                | 52,908,262    | 96.5            | 54,799,018         |
| P21 KO 2      | 34,864,059        | 82.9                | 40,361,731    | 95.9            | 42,072,527         |
| P21 KO 3      | 40,617,639        | 84.1                | 46,438,289    | 96.2            | 48,274,969         |
| C7 1          | 25,687,006        | 81.6                | 28,690,871    | 91.1            | 31,491,157         |
| C7 2          | 26,737,648        | 82.9                | 29,756,469    | 92.2            | 32,265,532         |
| C7 3          | 25,840,002        | 83.3                | 28,272,959    | 91.2            | 31,011,982         |
| C7 4          | 28,544,917        | 82.9                | 31,535,688    | 91.6            | 34,427,051         |
| G7 1          | 25,389,232        | 83.6                | 28,225,146    | 92.9            | 30,382,944         |
| G7_2          | 23,730,564        | 82.7                | 26,203,062    | 91.3            | 28,709,428         |
| G7 3          | 27,096,965        | 84.7                | 29,643,550    | 92.7            | 31,987,932         |
| G7 4          | 24,814,856        | 81.8                | 28,068,038    | 92.5            | 30,337,652         |
| C35 1         | 24,674,114        | 78.5                | 30,594,114    | 97.4            | 31,412,500         |
| C35 2         | 23,643,028        | 81.1                | 28,496,688    | 97.7            | 29,160,368         |
| C35 3         | 22,979,669        | 78.4                | 28,592,320    | 97.6            | 29,305,747         |
| G35_1         | 22,736,717        | 79.3                | 27,954,542    | 97.5            | 28,668,315         |
| G35 2         | 22,250,476        | 80.5                | 26,949,058    | 97.5            | 27,631,376         |
| G35 3         | 18,696,996        | 79.5                | 22,804,649    | 96.9            | 23,528,894         |
| G35 4         | 21,597,645        | 79.5                | 26,426,333    | 97.2            | 27,181,468         |

The alignment statistics refer to the number and percentage of reads that align to the genome and to the annotation used in the analysis.
