# Supplementary material for: Genetic Rescue of X-Linked Retinoschisis Mouse (Rs1−/y) Retina Induces Quiescence of the Retinal Microglial Inflammatory State Following AAV8-RS1 Gene Transfer and Identifies Gene Networks Underlying Retinal Recovery
Source: PubMed Central journal article supplement (PMC8312029; doi:10.1089/hum.2020.213), 2021-07-16
Supplement: Supp_Table2.pdf [file Supp_Table2.pdf]

**Table S2. List of TaqMan Primers, Antibodies and other reagents used in this study**

| <b>Catalogue Number</b> | <b>Name</b>                                              | <b>Source</b>    |
|-------------------------|----------------------------------------------------------|------------------|
| Mm00437762 ml           | B2m- beta-2 microglobulin                                | TFS <sup>a</sup> |
| Mm00504306 ml           | Bcl3- B-cell CLL/lymphoma 3                              | TFS              |
| Mm00437893 gl           | C4b- complement component 4B (Chido blood group)         | TFS              |
| Mm00432142 ml           | C1qa- complement C1q A chain                             | TFS              |
| Mm00516817 ml           | Cldn7- Claudin 7                                         | TFS              |
| Mm00432983 ml           | Edn2- endothelin 2                                       | TFS              |
| Mm01285715 ml           | Fgf2- fibroblast growth factor 2                         | TFS              |
| Mm00516023 ml           | Icam1- intercellular adhesion molecule 1                 | TFS              |
| Mm01156845 ml           | Ppef1- protein phosphatase with EF-hand domain 1         | TFS              |
| Mm00488076 ml           | Rs1- retinoschisin 1 (mouse)                             | TFS              |
| Mm00465263 ml           | Zan1- zonadhesin                                         | TFS              |
| Mm01219775 ml           | Stat3- signal transducer and activator of transcription3 | TFS              |
| Mm04277571 sl           | 18S ribosomal RNA                                        | TFS              |
| Hs99999901 sl           | 18s- human18S rRNA                                       | TFS              |
| Hs00171245 ml           | RS1- retinoschisin 1 (human)                             | TFS              |
| 304437                  | TaqMan™ Universal PCR Master Mix                         | TFS              |

**Antibodies and other reagents**

| <b>Catalogue number</b> | <b>Name</b>                                                                 | <b>Source</b>                 |
|-------------------------|-----------------------------------------------------------------------------|-------------------------------|
| MCA 1957                | Rat anti Mouse CD68 antibody, clone FA-11. 1:400                            | Bio-Rad <sup>b</sup>          |
| 019-19741               | Guinea Pig Anti-IBA1 Synaptic Systems. 1:500                                | Synaptic Systems <sup>c</sup> |
| Custom made             | Rabbit Anti-Retinoschisin. 1:1000                                           | TFS                           |
| A-11036                 | Goat anti-Rabbit IgG (H+L) Secondary Antibody, Alexa Fluor 568. 1:1000      | TFS                           |
| A-11073                 | Goat anti-Guinea Pig IgG (H+L), Secondary Antibody, Alexa Fluor 488. 1:1000 | TFS                           |
| A-21208                 | Donkey anti-Rat IgG (H+L), Secondary Antibody, Alexa Fluor 488. 1:1000      | TFS                           |
| D9542                   | DAPI-4',6-Diamidino-2-phenylindole dihydrochloride. 1: 5000                 | Sigma-Aldrich <sup>d</sup>    |

<sup>a</sup>Thermo Fisher Scientific, 81 Wyman St, Waltham, MA 02145 USA; <sup>b</sup>Bio-Rad, 2000 Alfred Nobel Drive Hercules, California 94547; Synaptic Systems, Sigma-Aldrich, PO Box 14508. St. Louis, MO 63178. USA.
