# Supplementary material for: Genetic Rescue of X-Linked Retinoschisis Mouse (Rs1−/y) Retina Induces Quiescence of the Retinal Microglial Inflammatory State Following AAV8-RS1 Gene Transfer and Identifies Gene Networks Underlying Retinal Recovery
Source: PubMed Central journal article supplement (PMC8312029; doi:10.1089/hum.2020.213), 2021-07-16
Supplement: Supp_Table3.pdf [file Supp_Table3.pdf]

**Table S3. Significantly Differentially Expressed Gene (DEGs) List. *Rs1*-KO vs. WT at P21**

| Gene                    | Transcript Count | Log FC   | Ave. Expression | P. Value | adj. P. Val | B        |
|-------------------------|------------------|----------|-----------------|----------|-------------|----------|
| <a href="#">Rs1</a>     | 3                | -5.36459 | 8.54            | 1.44E-12 | 2.11E-08    | 18.65226 |
| <a href="#">Ppef1</a>   | 3                | 5.562406 | 4.03            | 1.06E-10 | 5.19E-07    | 13.38634 |
| <a href="#">Edn2</a>    | 1                | 5.322363 | 3.41            | 8.40E-11 | 5.19E-07    | 13.07035 |
| <a href="#">C4b</a>     | 3                | 4.979958 | 4.62            | 7.95E-10 | 2.90E-06    | 12.69865 |
| <a href="#">Sepp1</a>   | 7                | 2.268762 | 5.91            | 4.04E-09 | 7.78E-06    | 11.82036 |
| <a href="#">Lrrc2</a>   | 3                | 2.1965   | 6.19            | 4.26E-09 | 7.78E-06    | 11.77467 |
| <a href="#">Fgf2os</a>  | 1                | 3.86026  | 3.61            | 2.90E-09 | 7.06E-06    | 11.52813 |
| <a href="#">E2f6</a>    | 1                | 1.539739 | 5.28            | 6.80E-09 | 1.10E-05    | 11.30202 |
| <a href="#">C1qa</a>    | 1                | 2.619059 | 3.61            | 8.00E-09 | 1.17E-05    | 10.87511 |
| <a href="#">Lad1</a>    | 3                | 4.388053 | 2.37            | 2.55E-09 | 7.06E-06    | 10.8401  |
| <a href="#">Rnf144b</a> | 2                | 1.313213 | 5.82            | 1.19E-08 | 1.58E-05    | 10.75171 |
| <a href="#">B2m</a>     | 1                | 2.141272 | 4.97            | 1.85E-08 | 2.08E-05    | 10.30848 |
| <a href="#">C1qb</a>    | 1                | 2.754169 | 3.81            | 2.11E-08 | 2.20E-05    | 10.05993 |
| <a href="#">H2-D1</a>   | 4                | 1.517083 | 5.39            | 2.94E-08 | 2.53E-05    | 9.844193 |
| <a href="#">Trem2</a>   | 4                | 3.302019 | 2.43            | 1.81E-08 | 2.08E-05    | 9.75111  |
| <a href="#">Mt2</a>     | 1                | 2.898466 | 4.66            | 3.28E-08 | 2.63E-05    | 9.729906 |
| <a href="#">Csf1r</a>   | 2                | 2.342391 | 4.83            | 3.49E-08 | 2.63E-05    | 9.68004  |
| <a href="#">Gm15983</a> | 1                | 1.629593 | 5.52            | 3.83E-08 | 2.63E-05    | 9.572016 |
| <a href="#">H2-K1</a>   | 9                | 1.933763 | 4.53            | 3.98E-08 | 2.63E-05    | 9.548351 |
| <a href="#">Fcgr3</a>   | 4                | 3.091408 | 2.3             | 2.46E-08 | 2.39E-05    | 9.492512 |
| <a href="#">Mpeg1</a>   | 1                | 3.694453 | 4.15            | 4.21E-08 | 2.63E-05    | 9.426489 |
| <a href="#">Gfap</a>    | 3                | 2.543331 | 5.71            | 4.47E-08 | 2.63E-05    | 9.419098 |
| <a href="#">Gnb3</a>    | 4                | 1.468042 | 8.86            | 4.33E-08 | 2.63E-05    | 9.351035 |
| <a href="#">Klhl29</a>  | 1                | 1.400407 | 6.02            | 4.78E-08 | 2.63E-05    | 9.319867 |
| <a href="#">Fcrls</a>   | 2                | 3.680731 | 2.14            | 2.80E-08 | 2.53E-05    | 9.257703 |
| <a href="#">Cx3cr1</a>  | 2                | 2.213516 | 3.5             | 5.30E-08 | 2.67E-05    | 9.198517 |
| <a href="#">Sec22c</a>  | 5                | 1.191877 | 7.67            | 5.52E-08 | 2.69E-05    | 9.114187 |
| <a href="#">C1qc</a>    | 2                | 2.90504  | 3.87            | 6.05E-08 | 2.85E-05    | 9.090567 |
| <a href="#">Ctss</a>    | 2                | 2.197745 | 4.65            | 6.88E-08 | 3.14E-05    | 9.006774 |
| <a href="#">Jak3</a>    | 5                | 2.851394 | 2.07            | 4.76E-08 | 2.63E-05    | 8.915463 |
| <a href="#">Antxr2</a>  | 3                | 2.685368 | 4.51            | 8.31E-08 | 3.58E-05    | 8.818659 |
| <a href="#">Pcolce</a>  | 12               | 2.325422 | 4.95            | 8.34E-08 | 3.58E-05    | 8.808967 |
| <a href="#">Cd53</a>    | 1                | 2.862634 | 1.29            | 5.01E-08 | 2.63E-05    | 8.56565  |
| <a href="#">Tnnt2</a>   | 15               | 3.740512 | 2.64            | 9.98E-08 | 3.98E-05    | 8.395787 |
| <a href="#">Fgf2</a>    | 8                | 3.142569 | 6.53            | 1.17E-07 | 4.27E-05    | 8.392376 |
| <a href="#">H2-Q4</a>   | 2                | 1.803411 | 3.23            | 1.30E-07 | 4.52E-05    | 8.342342 |
| <a href="#">Pdzhph1</a> | 3                | -1.04808 | 8.26            | 1.15E-07 | 4.27E-05    | 8.318886 |
| <a href="#">Bst2</a>    | 1                | 2.588175 | 1.55            | 8.88E-08 | 3.71E-05    | 8.26976  |
| <a href="#">Laptm5</a>  | 10               | 2.739791 | 3.07            | 1.37E-07 | 4.53E-05    | 8.253014 |
| <a href="#">Glb1l3</a>  | 1                | -2.98668 | 2.21            | 1.36E-07 | 4.53E-05    | 8.109352 |

|                               |    |          |       |          |          |          |
|-------------------------------|----|----------|-------|----------|----------|----------|
| <a href="#">Kremen1</a>       | 2  | 1.240757 | 5.76  | 2.18E-07 | 6.92E-05 | 7.740565 |
| <a href="#">Cebpd</a>         | 1  | 2.776443 | 3.86  | 2.61E-07 | 7.83E-05 | 7.682142 |
| <a href="#">Gadd45b</a>       | 1  | 2.046828 | 3     | 2.79E-07 | 7.98E-05 | 7.5961   |
| <a href="#">Tyrobp</a>        | 3  | 3.020541 | 2.44  | 2.60E-07 | 7.83E-05 | 7.563688 |
| <a href="#">Myo1f</a>         | 4  | 3.548627 | 0.56  | 1.21E-07 | 4.31E-05 | 7.53996  |
| <a href="#">Hexb</a>          | 1  | 1.416211 | 5.56  | 2.87E-07 | 8.08E-05 | 7.466647 |
| <a href="#">Mt1</a>           | 1  | 1.769827 | 5.47  | 3.13E-07 | 8.46E-05 | 7.392133 |
| <a href="#">Slc6a2</a>        | 2  | 3.209548 | 2.06  | 3.18E-07 | 8.46E-05 | 7.308293 |
| <a href="#">Agtbp1</a>        | 22 | 1.284392 | 8.6   | 3.08E-07 | 8.46E-05 | 7.259721 |
| <a href="#">Lgals3bp</a>      | 5  | 1.483505 | 4.01  | 4.00E-07 | 9.37E-05 | 7.243112 |
| <a href="#">Gm10030</a>       | 3  | 1.499563 | 3.85  | 4.04E-07 | 9.37E-05 | 7.240182 |
| <a href="#">Myo10</a>         | 13 | 1.193445 | 6.96  | 3.28E-07 | 8.56E-05 | 7.236936 |
| <a href="#">Gm16867</a>       | 7  | 1.255596 | 4.67  | 4.15E-07 | 9.49E-05 | 7.152438 |
| <a href="#">Agrn</a>          | 7  | 1.222994 | 7.06  | 3.57E-07 | 8.77E-05 | 7.143232 |
| <a href="#">Trf</a>           | 9  | 2.064224 | 7.21  | 3.60E-07 | 8.77E-05 | 7.134784 |
| <a href="#">A2m</a>           | 3  | 3.534161 | 4.75  | 4.55E-07 | 0.000102 | 7.112246 |
| <a href="#">Rabgef1</a>       | 9  | -1.12809 | 8.23  | 3.60E-07 | 8.77E-05 | 7.096322 |
| <a href="#">Serpina3n</a>     | 1  | 4.227071 | 4.38  | 4.86E-07 | 0.000103 | 7.065114 |
| <a href="#">Prtg</a>          | 2  | 1.710948 | 4.17  | 5.09E-07 | 0.000105 | 6.990273 |
| <a href="#">Apobec1</a>       | 9  | 2.726759 | 1.65  | 5.10E-07 | 0.000105 | 6.843387 |
| <a href="#">Fhad1</a>         | 8  | 1.787019 | 2.29  | 6.02E-07 | 0.000117 | 6.8134   |
| <a href="#">Bcl3</a>          | 6  | 5.05498  | 1     | 3.53E-07 | 8.77E-05 | 6.770225 |
| <a href="#">Fcgr2b</a>        | 7  | 3.53592  | 1.37  | 5.58E-07 | 0.000111 | 6.656808 |
| <a href="#">Cfi</a>           | 2  | 2.07837  | 1.54  | 6.36E-07 | 0.000119 | 6.653582 |
| <a href="#">Tgm2</a>          | 4  | 1.579609 | 3.26  | 7.81E-07 | 0.000137 | 6.595753 |
| <a href="#">Vcam1</a>         | 4  | 1.168031 | 4.39  | 7.32E-07 | 0.000135 | 6.585504 |
| <a href="#">Wdfy4</a>         | 4  | 3.976334 | -0.31 | 2.72E-07 | 7.96E-05 | 6.541561 |
| <a href="#">Adgre1</a>        | 2  | 3.68174  | 1.29  | 6.23E-07 | 0.000119 | 6.538922 |
| <a href="#">Stat3</a>         | 14 | 1.617044 | 7.07  | 6.35E-07 | 0.000119 | 6.525608 |
| <a href="#">Unc93b1</a>       | 4  | 2.406691 | 2.55  | 8.52E-07 | 0.000148 | 6.493895 |
| <a href="#">Fn1</a>           | 17 | 1.031186 | 6.2   | 7.52E-07 | 0.000136 | 6.384298 |
| <a href="#">Junb</a>          | 1  | 1.332954 | 4.61  | 8.88E-07 | 0.000149 | 6.36417  |
| <a href="#">Cyth4</a>         | 1  | 2.183564 | 1.51  | 8.90E-07 | 0.000149 | 6.348637 |
| <a href="#">2810032G03Rik</a> | 2  | 2.018415 | 1.88  | 9.49E-07 | 0.000152 | 6.342499 |
| <a href="#">Ly6e</a>          | 16 | 1.0764   | 5.1   | 9.21E-07 | 0.000151 | 6.265989 |
| <a href="#">Ly86</a>          | 1  | 1.997778 | 2.47  | 1.08E-06 | 0.000163 | 6.264408 |
| <a href="#">Gpr34</a>         | 2  | 2.180863 | 1.45  | 9.78E-07 | 0.000155 | 6.255348 |
| <a href="#">Mlf1</a>          | 4  | 1.156957 | 3.77  | 1.14E-06 | 0.000168 | 6.179653 |
| <a href="#">Il10ra</a>        | 3  | 2.293988 | 0.89  | 9.92E-07 | 0.000156 | 6.135389 |
| <a href="#">Lyz2</a>          | 1  | 4.883875 | 3.19  | 1.43E-06 | 0.000191 | 5.98976  |
| <a href="#">Osmr</a>          | 6  | 1.836776 | 3.88  | 1.39E-06 | 0.000188 | 5.982328 |
| <a href="#">Gm12802</a>       | 1  | 2.927223 | 3.13  | 1.49E-06 | 0.000195 | 5.9576   |
| <a href="#">Pbxip1</a>        | 5  | 1.236919 | 5.93  | 1.17E-06 | 0.00017  | 5.938087 |
| <a href="#">Myo5b</a>         | 11 | 1.132517 | 5.47  | 1.22E-06 | 0.000174 | 5.929234 |

|                           |    |          |        |          |          |          |
|---------------------------|----|----------|--------|----------|----------|----------|
| <a href="#">C1ra</a>      | 1  | 2.010114 | 1.63   | 1.49E-06 | 0.000195 | 5.899575 |
| <a href="#">Itgam</a>     | 6  | 1.629523 | 2.81   | 1.61E-06 | 0.000203 | 5.880033 |
| <a href="#">Btc</a>       | 4  | 1.905675 | 3.93   | 1.58E-06 | 0.000201 | 5.846078 |
| <a href="#">Syt15</a>     | 3  | 1.18492  | 3.93   | 1.69E-06 | 0.000207 | 5.761066 |
| <a href="#">Rbm17</a>     | 6  | 1.034837 | 6.21   | 1.37E-06 | 0.000188 | 5.74087  |
| <a href="#">Slc1a1</a>    | 5  | 1.021501 | 5.91   | 1.45E-06 | 0.000193 | 5.697615 |
| <a href="#">Pdlim3</a>    | 1  | 1.069679 | 4.2    | 1.77E-06 | 0.000213 | 5.68082  |
| <a href="#">Il17ra</a>    | 3  | 1.349266 | 2.45   | 2.08E-06 | 0.000237 | 5.631687 |
| <a href="#">Socs3</a>     | 3  | 2.240149 | 2.74   | 2.10E-06 | 0.000237 | 5.622132 |
| <a href="#">Pld4</a>      | 1  | 2.794211 | 1.75   | 2.14E-06 | 0.000237 | 5.558369 |
| <a href="#">Gm37904</a>   | 1  | 2.91267  | 1.08   | 1.98E-06 | 0.00023  | 5.545098 |
| <a href="#">Rnase4</a>    | 2  | 2.042237 | 2.55   | 2.28E-06 | 0.000243 | 5.541364 |
| <a href="#">Wwtr1</a>     | 2  | 1.158731 | 4.79   | 1.91E-06 | 0.000223 | 5.527664 |
| <a href="#">Calca</a>     | 7  | 2.442037 | 0.95   | 2.07E-06 | 0.000237 | 5.504937 |
| <a href="#">Tnfrsf1a</a>  | 6  | 1.635929 | 3.57   | 2.27E-06 | 0.000243 | 5.49284  |
| <a href="#">Fyb</a>       | 8  | 2.744067 | 0.73   | 2.14E-06 | 0.000237 | 5.423636 |
| <a href="#">Ms4a7</a>     | 5  | 1.912568 | 0.97   | 2.38E-06 | 0.000249 | 5.396562 |
| <a href="#">C3ar1</a>     | 1  | 4.68256  | 0.58   | 1.89E-06 | 0.000223 | 5.381981 |
| <a href="#">Gbp3</a>      | 7  | 2.243825 | 1.92   | 2.66E-06 | 0.000266 | 5.374319 |
| <a href="#">Atf3</a>      | 3  | 1.785837 | 3      | 2.68E-06 | 0.000266 | 5.365132 |
| <a href="#">Ttc39aos1</a> | 2  | 1.326864 | 2.71   | 2.95E-06 | 0.000285 | 5.277082 |
| <a href="#">Slc25a37</a>  | 4  | 1.52725  | 6.87   | 2.13E-06 | 0.000237 | 5.228926 |
| <a href="#">Bcl6</a>      | 2  | 1.144998 | 4.85   | 2.58E-06 | 0.000262 | 5.19822  |
| <a href="#">Hmha1</a>     | 5  | 1.843046 | 1.43   | 3.36E-06 | 0.000307 | 5.129135 |
| <a href="#">Fxyd3</a>     | 11 | 3.097417 | 0.73   | 3.04E-06 | 0.000293 | 5.105412 |
| <a href="#">Timp2</a>     | 2  | 1.006496 | 6.54   | 2.41E-06 | 0.00025  | 5.102793 |
| <a href="#">Ncf1</a>      | 7  | 1.546818 | 2.07   | 3.55E-06 | 0.000314 | 5.101715 |
| <a href="#">Cd47</a>      | 2  | 1.059343 | 6.47   | 2.76E-06 | 0.000272 | 4.964519 |
| <a href="#">Clec7a</a>    | 4  | 4.324545 | 0.56   | 3.52E-06 | 0.000314 | 4.890274 |
| <a href="#">Zbtb7c</a>    | 2  | 1.824776 | 1.85   | 4.61E-06 | 0.000378 | 4.844927 |
| <a href="#">Nckap1l</a>   | 1  | 1.692187 | 2.8    | 4.58E-06 | 0.000378 | 4.829354 |
| <a href="#">Vav1</a>      | 5  | 2.963201 | 0.21   | 3.82E-06 | 0.000329 | 4.82351  |
| <a href="#">Zan</a>       | 5  | -1.27666 | 5.98   | 3.29E-06 | 0.000303 | 4.804569 |
| <a href="#">Lgi4</a>      | 4  | 1.479873 | 3.1    | 4.80E-06 | 0.000388 | 4.758164 |
| RP23-100P8.3              | 1  | -1.41143 | 3.8    | 4.56E-06 | 0.000378 | 4.729204 |
| <a href="#">Itgb2</a>     | 5  | 2.709608 | 0.93   | 5.07E-06 | 0.000407 | 4.689568 |
| <a href="#">Flnc</a>      | 3  | 2.405153 | 1.27   | 5.28E-06 | 0.000415 | 4.684952 |
| <a href="#">Csf2rb</a>    | 1  | 2.757663 | -0.045 | 4.63E-06 | 0.000378 | 4.620928 |
| <a href="#">Spidr</a>     | 1  | 1.131897 | 3.09   | 5.51E-06 | 0.000428 | 4.611996 |
| <a href="#">Cd180</a>     | 5  | 2.817143 | 0.45   | 5.16E-06 | 0.00041  | 4.609068 |
| RP23-457J22.1             | 1  | 7.033131 | -1.66  | 1.12E-06 | 0.000168 | 4.602841 |
| <a href="#">Aox1</a>      | 2  | 1.447799 | 1.88   | 6.81E-06 | 0.00049  | 4.462236 |
| <a href="#">Kctd12</a>    | 2  | 1.232904 | 3.47   | 6.15E-06 | 0.000456 | 4.459951 |
| <a href="#">AF251705</a>  | 2  | 2.781759 | 0.15   | 6.07E-06 | 0.000455 | 4.423676 |

|                               |   |          |      |          |          |          |
|-------------------------------|---|----------|------|----------|----------|----------|
| <a href="#">Xlr3b</a>         | 3 | 1.512504 | 2.28 | 7.22E-06 | 0.00051  | 4.394108 |
| <a href="#">2810030D12Rik</a> | 4 | -1.14548 | 3.71 | 6.35E-06 | 0.000468 | 4.388411 |
| <a href="#">Micall2</a>       | 4 | 1.414021 | 1.55 | 7.50E-06 | 0.000519 | 4.367792 |
| <a href="#">Skap2</a>         | 7 | 1.404087 | 2.35 | 7.46E-06 | 0.000519 | 4.358093 |
| <a href="#">Rfx2</a>          | 2 | 1.800754 | 4.25 | 6.42E-06 | 0.000471 | 4.334246 |
| <a href="#">Psmb8</a>         | 3 | 1.692194 | 1.72 | 7.88E-06 | 0.000532 | 4.319305 |
| <a href="#">Gm14091</a>       | 1 | -2.26361 | 1.74 | 7.90E-06 | 0.000532 | 4.317259 |
| <a href="#">BC026585</a>      | 5 | 1.179213 | 3.43 | 7.21E-06 | 0.00051  | 4.297107 |
| <a href="#">Il6ra</a>         | 2 | 2.01351  | 1.36 | 8.21E-06 | 0.000548 | 4.273836 |
| <a href="#">Tgm7</a>          | 1 | -1.86045 | 0.27 | 7.62E-06 | 0.000523 | 4.270658 |
| <a href="#">Gm11754</a>       | 1 | -2.11861 | 0.84 | 8.25E-06 | 0.000548 | 4.246366 |
| <a href="#">Tmlhe</a>         | 1 | -1.12345 | 5.18 | 5.95E-06 | 0.000448 | 4.24559  |
| <a href="#">Rgs10</a>         | 6 | 1.215647 | 2.7  | 8.59E-06 | 0.000568 | 4.189709 |
| <a href="#">Syk</a>           | 5 | 2.21487  | 0.76 | 9.31E-06 | 0.000607 | 4.12288  |
| <a href="#">Ttll3</a>         | 9 | -1.03394 | 4.97 | 7.05E-06 | 0.000505 | 4.08923  |
| <a href="#">Hpgds</a>         | 3 | 2.266183 | 1.76 | 1.04E-05 | 0.000656 | 4.050141 |
| <a href="#">Sla</a>           | 5 | 2.768025 | 0.07 | 9.44E-06 | 0.00061  | 4.02524  |
| <a href="#">Icam1</a>         | 1 | 1.985802 | 0.79 | 1.09E-05 | 0.000673 | 3.981939 |
| <a href="#">Msn</a>           | 3 | 1.021714 | 5.27 | 7.61E-06 | 0.000523 | 3.977009 |
| <a href="#">Ifitm3</a>        | 1 | 1.648039 | 3.41 | 1.01E-05 | 0.000645 | 3.961075 |
| <a href="#">Ms4a6c</a>        | 2 | 3.463953 | 0.12 | 1.03E-05 | 0.000652 | 3.936923 |
| <a href="#">Fcer1g</a>        | 3 | 2.166495 | 2.07 | 1.27E-05 | 0.000747 | 3.837794 |
| <a href="#">Rab7b</a>         | 5 | 2.035995 | 0.66 | 1.28E-05 | 0.000747 | 3.822204 |
| <a href="#">Cd68</a>          | 3 | 3.170169 | 1.94 | 1.32E-05 | 0.00076  | 3.816364 |
| <a href="#">Serping1</a>      | 3 | 2.172205 | 4.42 | 1.12E-05 | 0.000682 | 3.738589 |
| <a href="#">Cebpa</a>         | 2 | 2.123857 | 0.68 | 1.46E-05 | 0.000824 | 3.697302 |
| <a href="#">Slco2b1</a>       | 9 | 1.087859 | 3.03 | 1.38E-05 | 0.000787 | 3.668562 |
| <a href="#">Fcgr1</a>         | 2 | 3.161248 | 0.4  | 1.62E-05 | 0.000871 | 3.566252 |
| <a href="#">Lin7b</a>         | 1 | 1.298025 | 2.51 | 1.66E-05 | 0.00089  | 3.527266 |
| <a href="#">Il10rb</a>        | 5 | 1.187569 | 2.32 | 1.73E-05 | 0.000913 | 3.501536 |
| <a href="#">Cd33</a>          | 6 | 2.798936 | 1.54 | 1.84E-05 | 0.000952 | 3.487604 |
| <a href="#">Cd52</a>          | 3 | 2.505228 | 0.16 | 1.76E-05 | 0.000921 | 3.4803   |
| <a href="#">P2ry13</a>        | 1 | 1.780057 | 0.86 | 1.92E-05 | 0.000972 | 3.44648  |
| <a href="#">Trim30a</a>       | 4 | 1.778862 | 1.17 | 2.01E-05 | 0.000995 | 3.404709 |
| <a href="#">Tmem176a</a>      | 7 | 1.101178 | 4.14 | 1.55E-05 | 0.000851 | 3.387508 |
| <a href="#">Hvcn1</a>         | 5 | 1.48037  | 1.18 | 2.10E-05 | 0.001011 | 3.362535 |
| <a href="#">Aif1</a>          | 7 | 2.334349 | 0.53 | 2.07E-05 | 0.001011 | 3.358852 |
| <a href="#">Tril</a>          | 1 | 1.141345 | 3.81 | 1.70E-05 | 0.000901 | 3.338676 |
| <a href="#">Arhgap30</a>      | 4 | 2.006999 | 0.46 | 2.15E-05 | 0.001028 | 3.326177 |
| <a href="#">Knstrn</a>        | 9 | -1.96794 | 2.4  | 2.08E-05 | 0.001011 | 3.313805 |
| <a href="#">Scube1</a>        | 5 | 2.674894 | 1.86 | 2.18E-05 | 0.00103  | 3.313545 |
| <a href="#">Myof</a>          | 2 | 1.170702 | 4.45 | 1.61E-05 | 0.000871 | 3.290614 |
| <a href="#">Gpnmb</a>         | 5 | 2.937172 | 4.76 | 1.69E-05 | 0.000898 | 3.286783 |
| <a href="#">Bag3</a>          | 1 | 1.232968 | 2.18 | 2.18E-05 | 0.00103  | 3.279563 |

|                           |    |          |      |          |          |          |
|---------------------------|----|----------|------|----------|----------|----------|
| <a href="#">Selenbp1</a>  | 5  | -1.58386 | 5.12 | 1.51E-05 | 0.000843 | 3.259647 |
| <a href="#">Il13ra1</a>   | 1  | 1.378434 | 0.91 | 2.37E-05 | 0.001084 | 3.241686 |
| <a href="#">Hsd17b2</a>   | 1  | 2.102877 | 0.89 | 2.42E-05 | 0.00109  | 3.223323 |
| <a href="#">Dab2</a>      | 14 | 1.991499 | 1.66 | 2.43E-05 | 0.001093 | 3.2054   |
| <a href="#">Clec2e</a>    | 1  | -1.27172 | 2.74 | 2.36E-05 | 0.001084 | 3.13368  |
| <a href="#">Ucp2</a>      | 11 | 1.011692 | 4.4  | 1.89E-05 | 0.000964 | 3.124661 |
| <a href="#">Wipf1</a>     | 7  | 1.213345 | 2.12 | 2.61E-05 | 0.001142 | 3.098011 |
| <a href="#">Blnk</a>      | 3  | 1.641797 | 1.1  | 2.80E-05 | 0.001187 | 3.078686 |
| <a href="#">Clec2d</a>    | 1  | 1.091448 | 1.95 | 2.73E-05 | 0.001168 | 3.062586 |
| <a href="#">Gm765</a>     | 2  | -1.54    | 0.73 | 3.08E-05 | 0.001241 | 2.987    |
| <a href="#">Cyba</a>      | 1  | 1.442734 | 1.74 | 3.04E-05 | 0.001236 | 2.973136 |
| <a href="#">Rad51</a>     | 8  | -1.01603 | 2.4  | 2.88E-05 | 0.001203 | 2.963737 |
| <a href="#">Nfkbie</a>    | 1  | 1.371529 | 1.21 | 3.21E-05 | 0.001272 | 2.940096 |
| <a href="#">Oasl2</a>     | 9  | 1.6655   | 3.67 | 2.60E-05 | 0.001142 | 2.9252   |
| <a href="#">Loxl4</a>     | 5  | 1.634247 | 3.28 | 2.76E-05 | 0.001175 | 2.918423 |
| <a href="#">Vsir</a>      | 7  | 1.763949 | 2.6  | 3.00E-05 | 0.001224 | 2.917126 |
| <a href="#">Il1r1</a>     | 3  | 1.135525 | 2.99 | 2.92E-05 | 0.001209 | 2.885098 |
| <a href="#">Ctsz</a>      | 1  | 1.148106 | 4.8  | 2.52E-05 | 0.001118 | 2.757761 |
| <a href="#">Ikzf1</a>     | 6  | 1.989688 | 0.21 | 3.87E-05 | 0.001431 | 2.756687 |
| <a href="#">Spata6</a>    | 14 | 1.174192 | 3.28 | 3.19E-05 | 0.001268 | 2.751185 |
| <a href="#">Fgd2</a>      | 8  | 2.205665 | 0.47 | 4.07E-05 | 0.001477 | 2.714054 |
| <a href="#">Cybb</a>      | 5  | 2.81731  | 0.59 | 4.20E-05 | 0.001492 | 2.685545 |
| <a href="#">Map3k8</a>    | 5  | 1.377276 | 1.53 | 4.10E-05 | 0.001481 | 2.683539 |
| <a href="#">D8Ertd82e</a> | 3  | 1.594599 | 1.52 | 4.16E-05 | 0.001488 | 2.668153 |
| <a href="#">Trim30d</a>   | 3  | 2.338382 | 0.69 | 4.31E-05 | 0.001508 | 2.660562 |
| <a href="#">Ighm</a>      | 2  | 1.890531 | 0.41 | 4.48E-05 | 0.001541 | 2.62337  |
| <a href="#">AU020206</a>  | 2  | 1.622382 | 1.37 | 4.62E-05 | 0.001571 | 2.573502 |
| <a href="#">Steap4</a>    | 1  | 3.108007 | 0.96 | 4.76E-05 | 0.001597 | 2.564464 |
| <a href="#">Irf5</a>      | 6  | 1.574843 | 1.04 | 4.76E-05 | 0.001597 | 2.554996 |
| <a href="#">Rpl36-ps9</a> | 1  | -1.52864 | 1    | 4.82E-05 | 0.001599 | 2.544108 |
| <a href="#">Bin2</a>      | 7  | 2.251222 | 0.26 | 4.99E-05 | 0.001633 | 2.516833 |
| <a href="#">Hpd1</a>      | 1  | -1.4903  | 1.39 | 5.22E-05 | 0.001691 | 2.444196 |
| <a href="#">Pik3cd</a>    | 14 | 1.013509 | 2.77 | 4.62E-05 | 0.001571 | 2.430706 |
| <a href="#">Gbp9</a>      | 4  | 1.566049 | 1.79 | 5.28E-05 | 0.001697 | 2.408589 |
| <a href="#">Gpc3</a>      | 2  | 1.012263 | 3.45 | 4.37E-05 | 0.001514 | 2.388998 |
| <a href="#">Wnt9b</a>     | 1  | -1.80409 | 1.68 | 5.44E-05 | 0.001727 | 2.385086 |
| <a href="#">Nlrc5</a>     | 6  | 2.830404 | 0.23 | 5.82E-05 | 0.001806 | 2.366635 |
| <a href="#">Irf8</a>      | 7  | 1.783125 | 1.51 | 5.63E-05 | 0.001763 | 2.365604 |
| <a href="#">Tgfbr2</a>    | 2  | 1.32892  | 2.86 | 5.34E-05 | 0.00171  | 2.274056 |
| <a href="#">Plpp2</a>     | 4  | -1.16454 | 5.59 | 3.51E-05 | 0.001342 | 2.273213 |
| <a href="#">Timp1</a>     | 2  | 2.200556 | 0.55 | 6.45E-05 | 0.001905 | 2.269659 |
| <a href="#">Nudt6</a>     | 10 | 1.210648 | 1.98 | 6.08E-05 | 0.001867 | 2.242408 |
| <a href="#">Ptpn6</a>     | 11 | 1.82806  | 1.18 | 6.56E-05 | 0.001924 | 2.232669 |
| <a href="#">Evi2a</a>     | 5  | 2.099954 | 0.22 | 6.71E-05 | 0.001951 | 2.232077 |

|                               |    |          |      |          |          |          |
|-------------------------------|----|----------|------|----------|----------|----------|
| <a href="#">Muc2</a>          | 8  | 1.060897 | 2.14 | 6.08E-05 | 0.001867 | 2.223778 |
| <a href="#">C3</a>            | 4  | 2.405308 | 1.8  | 6.45E-05 | 0.001905 | 2.215337 |
| <a href="#">Tmem71</a>        | 1  | 1.934295 | 0.29 | 6.88E-05 | 0.001958 | 2.20853  |
| <a href="#">Slc3a1</a>        | 1  | -1.09568 | 1.44 | 6.59E-05 | 0.001924 | 2.202175 |
| <a href="#">Gatm</a>          | 3  | 1.35381  | 1.22 | 6.76E-05 | 0.001952 | 2.195862 |
| <a href="#">H2-T23</a>        | 4  | 1.204681 | 2.58 | 5.96E-05 | 0.00184  | 2.194062 |
| <a href="#">Grn</a>           | 10 | 1.388875 | 5.62 | 3.93E-05 | 0.00144  | 2.164756 |
| <a href="#">Tlr2</a>          | 1  | 2.153766 | 0.48 | 7.22E-05 | 0.001999 | 2.160763 |
| <a href="#">Zc3hav1</a>       | 4  | 1.691958 | 1.71 | 6.80E-05 | 0.001955 | 2.158762 |
| <a href="#">F630040K05Rik</a> | 2  | -1.56265 | 5.36 | 4.16E-05 | 0.001488 | 2.128189 |
| <a href="#">Klhl6</a>         | 4  | 1.845166 | 0.38 | 7.56E-05 | 0.002037 | 2.117231 |
| <a href="#">Mrc1</a>          | 2  | 3.067374 | 1    | 7.53E-05 | 0.002037 | 2.112534 |
| <a href="#">Hpse</a>          | 2  | 1.369527 | 1.74 | 7.24E-05 | 0.001999 | 2.087795 |
| <a href="#">Itgb8</a>         | 3  | 1.130772 | 4.71 | 5.06E-05 | 0.001652 | 2.01943  |
| <a href="#">Tagln2</a>        | 4  | 1.613056 | 3.05 | 6.74E-05 | 0.001951 | 2.005869 |
| <a href="#">Ptprc</a>         | 13 | 1.767865 | 1.52 | 8.33E-05 | 0.002192 | 1.968563 |
| <a href="#">Plxnd1</a>        | 5  | 1.103044 | 3.44 | 6.60E-05 | 0.001924 | 1.954185 |
| <a href="#">Rtp3</a>          | 3  | 1.318914 | 1.24 | 8.84E-05 | 0.002258 | 1.923053 |
| <a href="#">Phlda3</a>        | 2  | 1.116912 | 2.18 | 8.17E-05 | 0.002158 | 1.91355  |
| <a href="#">Gm10857</a>       | 2  | -2.36785 | 0.02 | 9.77E-05 | 0.002379 | 1.870407 |
| <a href="#">3010001F23Rik</a> | 5  | -1.48393 | 3.5  | 7.11E-05 | 0.00199  | 1.865621 |
| <a href="#">Col24a1</a>       | 4  | 1.110159 | 0.93 | 9.55E-05 | 0.002345 | 1.863491 |
| <a href="#">Ltbr</a>          | 3  | 1.129217 | 3.14 | 7.54E-05 | 0.002037 | 1.861392 |
| <a href="#">Tmem98</a>        | 1  | 1.131313 | 3.54 | 7.29E-05 | 0.002004 | 1.831324 |
| <a href="#">Scn4a</a>         | 2  | -1.04513 | 4.9  | 5.75E-05 | 0.001796 | 1.829236 |
| <a href="#">H2-Q7</a>         | 6  | 1.123279 | 2.23 | 8.98E-05 | 0.002266 | 1.808722 |
| <a href="#">C130080G10Rik</a> | 5  | -1.41735 | 2.03 | 9.28E-05 | 0.00231  | 1.796788 |
| <a href="#">Tmem26</a>        | 1  | 1.249696 | 3.56 | 7.73E-05 | 0.002076 | 1.769434 |
| <a href="#">A530058N18Rik</a> | 2  | -1.15651 | 1.72 | 0.0001   | 0.002409 | 1.748306 |
| <a href="#">Ptgs1</a>         | 5  | 1.537662 | 1.26 | 0.000106 | 0.002513 | 1.738036 |
| <a href="#">Lgals9</a>        | 4  | 1.430116 | 2.14 | 9.83E-05 | 0.00239  | 1.73153  |
| <a href="#">Parp14</a>        | 3  | 1.600255 | 3.01 | 8.81E-05 | 0.002258 | 1.728073 |
| <a href="#">Ugt1a6a</a>       | 4  | 1.926553 | 0.67 | 0.000114 | 0.002615 | 1.702313 |
| <a href="#">Dock2</a>         | 7  | 2.14893  | 1.1  | 0.000112 | 0.002587 | 1.700325 |
| <a href="#">Fcamr</a>         | 2  | 1.328935 | 1.39 | 0.00011  | 0.002563 | 1.687161 |
| <a href="#">Ppargc1b</a>      | 3  | -1.03579 | 6.24 | 5.81E-05 | 0.001806 | 1.658651 |
| <a href="#">Slc38a5</a>       | 4  | 1.28096  | 0.71 | 0.00012  | 0.002693 | 1.648458 |
| <a href="#">Hdc</a>           | 5  | -2.43056 | 1.22 | 0.000118 | 0.002654 | 1.644806 |
| <a href="#">Rab32</a>         | 1  | 1.283058 | 0.64 | 0.000129 | 0.002788 | 1.580356 |
| <a href="#">Dusp18</a>        | 2  | 1.016886 | 1.31 | 0.000126 | 0.002765 | 1.551177 |
| <a href="#">Ptgfr</a>         | 3  | 2.219725 | 0.59 | 0.000136 | 0.002872 | 1.532802 |
| <a href="#">Marveld3</a>      | 3  | 1.107676 | 3.34 | 9.96E-05 | 0.002406 | 1.531946 |
| <a href="#">Abcc3</a>         | 6  | 2.533197 | 0.09 | 0.000141 | 0.002941 | 1.513493 |
| <a href="#">Crym</a>          | 2  | 1.514085 | 6.23 | 7.06E-05 | 0.001986 | 1.465167 |

|                               |    |          |      |          |          |          |
|-------------------------------|----|----------|------|----------|----------|----------|
| <a href="#">2310030A07Rik</a> | 1  | -1.11163 | 2.48 | 0.000122 | 0.002714 | 1.445744 |
| <a href="#">Plcg2</a>         | 1  | 1.286844 | 1.18 | 0.000143 | 0.002943 | 1.441539 |
| <a href="#">Mef2b</a>         | 4  | -1.33051 | 0.83 | 0.000153 | 0.003049 | 1.397958 |
| <a href="#">Gm16055</a>       | 1  | -1.92209 | 3.46 | 0.000112 | 0.002587 | 1.395112 |
| <a href="#">Prph</a>          | 2  | 1.291532 | 2.8  | 0.000131 | 0.002804 | 1.334733 |
| <a href="#">Sh2d1a</a>        | 7  | -1.20024 | 2.35 | 0.000143 | 0.002951 | 1.298921 |
| <a href="#">Slc37a2</a>       | 3  | 1.120067 | 1.62 | 0.00016  | 0.003142 | 1.28053  |
| <a href="#">Gm8995</a>        | 2  | 1.887127 | 0.77 | 0.000175 | 0.00331  | 1.273796 |
| <a href="#">Zfp92</a>         | 2  | 1.077455 | 1.43 | 0.000172 | 0.003279 | 1.225697 |
| <a href="#">Plin2</a>         | 8  | 1.081837 | 3.02 | 0.000142 | 0.002941 | 1.20943  |
| <a href="#">Tlr7</a>          | 6  | 3.563313 | 0.99 | 0.000192 | 0.003489 | 1.188326 |
| <a href="#">Col17a1</a>       | 4  | 1.161906 | 3.26 | 0.000142 | 0.002941 | 1.16848  |
| <a href="#">1600014C23Rik</a> | 1  | -1.11292 | 0.75 | 0.000194 | 0.003521 | 1.158706 |
| <a href="#">Adgrg6</a>        | 4  | 1.144142 | 2.34 | 0.00017  | 0.003256 | 1.125852 |
| <a href="#">Insl5</a>         | 2  | -1.12156 | 2.17 | 0.000177 | 0.003332 | 1.105728 |
| <a href="#">Tmem173</a>       | 1  | 1.317155 | 0.43 | 0.00021  | 0.003666 | 1.105632 |
| <a href="#">Fosb</a>          | 7  | 1.698863 | 2.53 | 0.000177 | 0.003332 | 1.068168 |
| <a href="#">Esrp1</a>         | 7  | -1.42145 | 0.71 | 0.000214 | 0.003679 | 1.066659 |
| <a href="#">S1pr2</a>         | 1  | 1.176934 | 1.4  | 0.000204 | 0.003627 | 1.053393 |
| <a href="#">Siglec1</a>       | 3  | 1.419773 | 0.63 | 0.000219 | 0.003726 | 1.050895 |
| <a href="#">Tmem132b</a>      | 3  | 1.062464 | 4.73 | 0.000125 | 0.002763 | 1.031017 |
| <a href="#">4833428L15Rik</a> | 1  | -1.40401 | 0.74 | 0.000224 | 0.003771 | 1.016571 |
| <a href="#">Inpp5d</a>        | 11 | 1.281788 | 2.43 | 0.000191 | 0.003477 | 0.996163 |
| <a href="#">Cd44</a>          | 9  | 1.404865 | 4.06 | 0.000147 | 0.002963 | 0.994327 |
| <a href="#">Gbp2</a>          | 2  | 2.133064 | 2.05 | 0.000217 | 0.003702 | 0.932984 |
| <a href="#">Gna14</a>         | 1  | 1.162536 | 1.84 | 0.000219 | 0.003726 | 0.929691 |
| <a href="#">Pdlim4</a>        | 5  | 1.001569 | 3.14 | 0.000182 | 0.003384 | 0.922835 |
| <a href="#">Rac2</a>          | 1  | 1.604035 | 1.46 | 0.000235 | 0.003883 | 0.910365 |
| <a href="#">Cldn7</a>         | 5  | -1.99079 | 0.81 | 0.000255 | 0.004041 | 0.888693 |
| <a href="#">Glipr2</a>        | 2  | 1.426641 | 0.64 | 0.00026  | 0.004088 | 0.877924 |
| <a href="#">Kif4</a>          | 3  | -1.14011 | 1.84 | 0.00023  | 0.003831 | 0.872727 |
| <a href="#">1700119H24Rik</a> | 1  | -1.23239 | 1.54 | 0.000243 | 0.003957 | 0.856228 |
| <a href="#">Dysf</a>          | 16 | 1.080152 | 1.2  | 0.000257 | 0.004067 | 0.836206 |
| <a href="#">Fabp4</a>         | 2  | -1.12245 | 2.57 | 0.000218 | 0.003715 | 0.821714 |
| <a href="#">Lif</a>           | 3  | 2.562609 | 0.39 | 0.000283 | 0.004279 | 0.820288 |
| <a href="#">P2ry12</a>        | 5  | 1.033961 | 1.98 | 0.000247 | 0.00398  | 0.786379 |
| <a href="#">Kremen2</a>       | 1  | -1.11525 | 1.35 | 0.000269 | 0.004152 | 0.773072 |
| <a href="#">Arpc1b</a>        | 11 | 1.215679 | 3.24 | 0.000208 | 0.003652 | 0.76913  |
| <a href="#">Naprt</a>         | 1  | 1.065871 | 1.17 | 0.000278 | 0.004242 | 0.759491 |
| <a href="#">Gm18289</a>       | 1  | -1.17738 | 0.65 | 0.000292 | 0.004357 | 0.756775 |
| <a href="#">Pik3cg</a>        | 4  | 1.293896 | 1.1  | 0.000286 | 0.004295 | 0.740534 |
| <a href="#">A930031H19Rik</a> | 2  | -1.7314  | 1.81 | 0.000266 | 0.004126 | 0.73556  |
| <a href="#">BC028471</a>      | 6  | -1.1992  | 1.1  | 0.000294 | 0.004372 | 0.70699  |
| <a href="#">H2-M3</a>         | 1  | 1.39409  | 0.51 | 0.000316 | 0.004588 | 0.693033 |

|                              |    |          |       |          |          |          |
|------------------------------|----|----------|-------|----------|----------|----------|
| <a href="#">Apoe</a>         | 11 | 1.019721 | 9.73  | 0.000127 | 0.002769 | 0.678935 |
| <a href="#">Mcm10</a>        | 10 | -1.23897 | 1.94  | 0.000283 | 0.004279 | 0.644301 |
| <a href="#">Tmprss7</a>      | 5  | -1.17958 | 1.22  | 0.000335 | 0.004749 | 0.561033 |
| <a href="#">C1s1</a>         | 5  | 1.186432 | 1.33  | 0.000334 | 0.004749 | 0.553899 |
| <a href="#">Cd109</a>        | 2  | 1.588996 | -0.86 | 0.00041  | 0.005247 | 0.497365 |
| <a href="#">Fblim1</a>       | 15 | 1.221367 | 0.89  | 0.000394 | 0.005131 | 0.434514 |
| <a href="#">Synpo</a>        | 12 | 1.12725  | 2.6   | 0.000318 | 0.004609 | 0.427656 |
| <a href="#">Cd74</a>         | 3  | 2.993108 | 0.66  | 0.00042  | 0.0053   | 0.417524 |
| <a href="#">Lyn</a>          | 4  | 1.158071 | 2.54  | 0.000326 | 0.004673 | 0.41198  |
| <a href="#">Parp9</a>        | 7  | 1.045298 | 2.79  | 0.000317 | 0.004601 | 0.397864 |
| <a href="#">Tifab</a>        | 1  | 1.254797 | 0.73  | 0.000424 | 0.005327 | 0.375601 |
| <a href="#">Arhgap22</a>     | 8  | 1.062544 | 1.09  | 0.000415 | 0.005264 | 0.358643 |
| <a href="#">Asf1b</a>        | 3  | 1.098979 | 1.59  | 0.000392 | 0.005115 | 0.356894 |
| <a href="#">Pik3ap1</a>      | 1  | 1.262216 | 1.41  | 0.000413 | 0.005256 | 0.328038 |
| <a href="#">Gm11961</a>      | 2  | -1.05947 | 2.96  | 0.000328 | 0.004688 | 0.32505  |
| <a href="#">Gm8251</a>       | 1  | -1.01568 | 1.17  | 0.000427 | 0.005351 | 0.314686 |
| <a href="#">Rtkn2</a>        | 6  | 1.255934 | 1.69  | 0.000425 | 0.005337 | 0.263621 |
| <a href="#">Lcp1</a>         | 11 | 1.110987 | 3.21  | 0.000338 | 0.004773 | 0.255664 |
| <a href="#">Tlr4</a>         | 4  | 1.357094 | 0.47  | 0.000492 | 0.005908 | 0.248798 |
| <a href="#">Tectb</a>        | 6  | 1.718207 | 0.89  | 0.000478 | 0.005793 | 0.243673 |
| <a href="#">Adamts15</a>     | 7  | 1.048035 | 2.92  | 0.00036  | 0.004894 | 0.239683 |
| <a href="#">Stab1</a>        | 13 | 1.369317 | 3.71  | 0.000325 | 0.004672 | 0.208895 |
| <a href="#">Gbp7</a>         | 2  | 1.247821 | 2.81  | 0.000379 | 0.005017 | 0.208498 |
| <a href="#">Prelp</a>        | 2  | 1.124683 | 5.86  | 0.000239 | 0.003922 | 0.169169 |
| <a href="#">RP23-449M8.5</a> | 2  | -1.30443 | 2.36  | 0.000433 | 0.005395 | 0.137851 |
| <a href="#">C4bp-ps1</a>     | 1  | -1.55056 | 0.93  | 0.00053  | 0.006149 | 0.126005 |
| <a href="#">Slfn5</a>        | 4  | 1.109433 | 2.03  | 0.000475 | 0.00577  | 0.096157 |
| <a href="#">Lpin3</a>        | 5  | 1.669934 | 0.7   | 0.000574 | 0.006507 | 0.075644 |
| <a href="#">Gbp6</a>         | 3  | 1.330741 | 3.22  | 0.000406 | 0.00522  | 0.063375 |
| <a href="#">H19</a>          | 5  | 1.757524 | 0.83  | 0.000599 | 0.006678 | 0.019778 |
| <a href="#">Abca9</a>        | 2  | 1.105119 | 2.89  | 0.00045  | 0.005537 | 0.009874 |
| <a href="#">Tmco4</a>        | 4  | 1.131509 | 0.95  | 0.000604 | 0.006712 | -0.01022 |
| <a href="#">Nfatc1</a>       | 4  | 1.48133  | 0.59  | 0.000649 | 0.007066 | -0.04103 |
| <a href="#">Cd22</a>         | 15 | 1.073071 | 0.83  | 0.000652 | 0.007098 | -0.07568 |
| <a href="#">Spp1</a>         | 7  | 2.194994 | 4.95  | 0.000378 | 0.005007 | -0.13844 |
| <a href="#">Kdelr3</a>       | 1  | 1.120307 | 1     | 0.000724 | 0.007578 | -0.20239 |
| <a href="#">Cyr61</a>        | 1  | 1.112261 | 1.99  | 0.000644 | 0.007032 | -0.21643 |
| <a href="#">Pros1</a>        | 3  | 1.07825  | 3.96  | 0.000462 | 0.005653 | -0.22643 |
| <a href="#">Nfkb2</a>        | 2  | 1.281216 | 1.73  | 0.000681 | 0.007292 | -0.23344 |
| <a href="#">Rnf183</a>       | 3  | -1.19479 | 0.67  | 0.000796 | 0.007995 | -0.26546 |
| <a href="#">Gm8956</a>       | 1  | -1.00927 | 1.84  | 0.000712 | 0.007527 | -0.30706 |
| <a href="#">Irgm2</a>        | 3  | 1.340165 | 1.89  | 0.000738 | 0.00767  | -0.33759 |
| <a href="#">Fli1</a>         | 2  | 1.050789 | 1.03  | 0.00085  | 0.008377 | -0.37109 |
| <a href="#">Ifih1</a>        | 5  | 1.256599 | 2.51  | 0.000727 | 0.00759  | -0.42695 |



|                           |   |          |      |          |          |          |
|---------------------------|---|----------|------|----------|----------|----------|
| <a href="#">Pycard</a>    | 2 | 1.726713 | 1.06 | 0.000929 | 0.008776 | -0.45549 |
| <a href="#">Ncf2</a>      | 6 | 1.02667  | 2.26 | 0.00078  | 0.007907 | -0.46194 |
| <a href="#">Gm12996</a>   | 1 | -1.8641  | 0.41 | 0.00107  | 0.009613 | -0.53103 |
| <a href="#">Cmtm3</a>     | 1 | 1.001929 | 1.27 | 0.000977 | 0.009095 | -0.54574 |
| <a href="#">Gm29427</a>   | 1 | -1.03385 | 3.22 | 0.00074  | 0.007678 | -0.59118 |
| <a href="#">Kcng1</a>     | 3 | 1.005854 | 1.29 | 0.001097 | 0.009775 | -0.6685  |
| <a href="#">Bub1b</a>     | 4 | 1.248703 | 4.8  | 0.000687 | 0.007337 | -0.81123 |
| <a href="#">Gm20425</a>   | 1 | 1.150972 | 3.21 | 0.000929 | 0.008776 | -0.81697 |
| <a href="#">Crxos</a>     | 6 | -1.06494 | 4.57 | 0.000757 | 0.007759 | -0.89338 |
| <a href="#">Rn18s-rs5</a> | 2 | -1.20762 | 9.17 | 0.00101  | 0.009262 | -1.56074 |
