# Supplementary material for: Genetic Rescue of X-Linked Retinoschisis Mouse (Rs1−/y) Retina Induces Quiescence of the Retinal Microglial Inflammatory State Following AAV8-RS1 Gene Transfer and Identifies Gene Networks Underlying Retinal Recovery
Source: PubMed Central journal article supplement (PMC8312029; doi:10.1089/hum.2020.213), 2021-07-16
Supplement: Supp_Table4.pdf [file Supp_Table4.pdf]

**Table S4. Significant Enriched GO Terms of DEGs in *Rs1*-KO retina at P21-Biological Processes**

(A-Annotated Count; S- Significant Count; FDR-False Detection Rate)

**2 GO:0002376 immune system process** A1311/ S124 FDR 8.19E-28

A2m,Adgre1,Aif1,Apobec1,B2m,Bcl3,Bcl6,Blnk,Bst2,C1qa,C1qb,C1qc,C1ra,C1s1,C3,C3ar1,C4b,Cd109,Cd180,Cd44,Cd47,Cd74,Cebpa,Cebpd,Cfi,Clec2d,Cmtm3,Col24a1,Csf1r,Ctss,Cx3cr1,Cyba,Cybb,Dab2,Dock2,Edn2,Fcaml,Fcer1g,Fcgr1,Fcgr2b,Fcgr3,Fli1,Fyb,Gbp2,Gbp3,Gbp6,Gbp7,Gbp9,Gpc3,H2-D1,H2-K1,H2-M3,H2-Q4,H2-Q7,H2-T23,Icam1,Ifih1,Ifitm3,Ighm,Ikzf1,Ill10rb,Ill17ra,Ill1r1,Inpp5d,Irf5,Irf8,Itgam,Itgb2,Jak3,Junb,Klhl6,Lcp1,Lgals9,Lif,Ltbr,Ly86,Lyn,Map3k8,Mif1,Mrc1,Msn,Myo1f,Ncf1,Nckap11,Nfatc1,Nfkb2,Nlrc5,Oasl2,P2ry12,Parp9,Pik3ap1,Pik3cd,Pik3cg,Plcg2,Pld4,Psm8,Ptpn6,Ptpnc,Pycard,Rab32,Rab7b,Rac2,Rtkn2,Serping1,Skap2,Spp1,Syk,Tgfb2,Tlr2,Tlr4,Tlr7,Tmem173,Tmem176a,Tnfrsf1a,Trem2,Trf,Tril,Trim30a,Tyrobp,Unc93b1,Vav1,Vcam1,Vsir,Zc3hav1

**7 GO:0002252 immune effector process** A 420/ S59 FDR 8.19E-28

A2m,Apobec1,B2m,Bcl3,Bcl6,Bst2,C1qa,C1qb,C1qc,C1ra,C1s1,C3,C4b,Cd180,Cd47,Cd74,Cfi,Clec2d,Cx3cr1,Dock2,Fcer1g,Fcgr1,Fcgr2b,Fcgr3,H2-D1,H2-K1,H2-M3,H2-T23,Icam1,Ifih1,Ifitm3,Ighm,Ill10rb,Inpp5d,Irf5,Jak3,Lcp1,Lgals9,Lyn,Myo1f,Ncf1,Oasl2,Plcg2,Ptpn6,Ptpnc,Pycard,Rac2,Serping1,Syk,Tlr2,Tlr4,Tlr7,Tmem173,Tril,Tyrobp,Unc93b1,Vav1,Vsir,Zc3hav1

**17 GO:0051707 response to another organism** A 431/ S 52 FDR 2.25E-22

Apobec1,B2m,Bcl3,Bst2,Cd180,Cd47,Cyba,Fcer1g,Fcgr1,Fcgr2b,Gbp2,Gbp3,Gbp6,Gbp7,Gbp9,H2-K1,H2-M3,H2-T23,Ifih1,Ifitm3,Ighm,Ill10rb,Ill17ra,Irf5,Irf8,Junb,Lgals9,Ltbr,Ly86,Lyn,Lyz2,Mrc1,Myo1f,Ncf1,Ncf2,Oasl2,Pik3cd,Plcg2,Ptgrf,Ptpnc,Pycard,Stab1,Syk,Tlr2,Tlr4,Tlr7,Tmem173,Tnfrsf1a,Trem2,Unc93b1,Wipf1,Zc3hav1

**26 GO:0001775 cell activation** A 530/ S53 FDR 3.69E-19

Aif1,Apoe,B2m,Bcl3,Bcl6,Blnk,Cd180,Cd44,Cd47,Cd74,Cx3cr1,Dock2,Edn2,Fcer1g,Fcgr2b,Fcgr3,Fn1,H2-M3,H2-T23,Icam1,Ighm,Ikzf1,Ill17ra,Inpp5d,Itgam,Itgb2,Jak3,Lcp1,Lgals9,Ltbr,Lyn,Myo1f,Nckap11,Nfatc1,Nfkb2,P2ry12,Pik3cd,Plcg2,Ptpn6,Ptpnc,Pycard,Rac2,Skap2,Syk,Tgfb2,Timp1,Tlr2,Tlr4,Tlr7,Tyrobp,Vav1,Vcam1,Vsir

**32 GO:0016064 immunoglobulin mediated immune response** A 62/ S20 FDR 1.68E-16

Bcl3,Bcl6,C1qa,C1qb,C1qc,C1ra,C1s1,C3,C4b,Cd74,Cfi,Fcer1g,Fcgr1,Fcgr2b,Fcgr3,Ighm,Inpp5d,Ptpn6,Ptpnc,Serping1

**35 GO:0034097 response to cytokine** A 349/ S40 FDR 3.58E-

16Bst2,Cd74,Cebpa,Csf1r,Csf2rb,Cx3cr1,Edn2,Fn1,Gbp2,Gbp3,Gbp6,Gbp7,Gbp9,H2-Q7,Ifitm3,Ill13ra1,Ill17ra,Ill1r1,Ill6ra,Irf5,Irgm2,Jak3,Junb,Mrc1,Nfkb2,Nlrc5,Osmr,Parp9,Ptpn6,Ptpnc,Pycard,Serpina3n,Socs3,Stat3,Syk,Timp1,Timp2,Tmem173,Tnfrsf1a,Trem2

**37 GO:0019882 antigen processing and presentation** A 68/ S 20 FDR 1.20E-15

B2m,Cd74,Ctss,Fcer1g,Fcgr1,Fcgr2b,Fcgr3,H2-D1,H2-K1,H2-M3,H2-Q4,H2-Q7,H2-T23,Icam1,Ighm,Psm8,Pycard,Rab32,Trem2,Unc93b1

**39 GO:0048002 antigen processing and presentation of peptide antigen** A38/ S 16 FDR 3.21E-15

B2m, Cd74,Ctss,Fcer1g,Fcgr1,Fcgr2b,Fcgr3,H2-D1,H2-K1,H2-M3,H2-Q4,H2-Q7,H2-T23,Pycard,Trem2,Unc93b1

**40 GO:0002455 humoral immune response mediated by circulating immunoglobulin A** 21/ S13 FDR 4.42E-15

Bcl3,C1qa,C1qb,C1qc,C1ra,C1s1,C3,Cfi,Fcgr2b,Ighm,Ptpn6,Ptpnc, Serping1

**49 GO:0042127 regulation of cell proliferation** A 1024/ S 65 FDR 7.37E-14

Aif1,Apobec1,Apoe,Atf3,Bcl6,Btc,C3ar1,Cd109,Cd44,Cd47,Cd74,Cebpa,Csf1r,Cx3cr1,Cyba,Cyr61,Dab2,Edn2,Fcgr2b,Fgf2,Fn1,Gfap,Gpc3,Grn,H19,H2-M3,H2-T23,Hpgds,Hpse,Ifitm3,Ighm,Il6ra,Inpp5d,Jak3,Junb,Lgals9,Lif,Ltbr,Lyn,Marveld3,Muc2,Nckap11,Nfatc1,Osmr,Ptgr,Ptgs1,Ptpn6,Ptpnc,Pycard,Rac2,Rtkn2,Skap2,Stat3,Syk,Tgfb2,Tgm2,Timp1,Timp2,Tlr2,Tlr4,Tnfrsf1a,Trf,Vcam1,Vsir,Wwtr1

**62 GO:0002757 immune response-activating signal transduction** A147 S 24 FDR 7.14E-13

C3ar1,Cd180,Cmtm3,Cyba,Fcer1g,Ifih1,Ighm,Klhl6,Lgals9,Lyn,Nckap11,Pik3ap1,Plcg2,Ptpn6,Ptpnc,Rab7b,Skap2,Syk,Tlr2,Tlr4,Tlr7,Tril,Trim30a,Unc93b1

**63 GO:0032103 positive regulation of response to external stimulus** A147 S 24 FDR 7.14E-13

Aif1,C3,C3ar1,Cd180,Cd47,Cd74,Ctss,Cyba,Edn2,Fcer1g,Fcgr1,Fcgr3,Fgf2,Fn1,Il17ra,Lgals9,Ly86,Nckap11,Pik3cg,Rac2,Tgm2,Tlr2,Tlr4,Tnfrsf1a

**67 GO:0050727 regulation of inflammatory response** A 168 S 25 FDR 1.65E-12

A2m,Apoe,Bcl6,C3,Cd44,Cd47,Ctss,Cx3cr1,Fcer1g,Fcgr1,Fcgr2b,Fcgr3,Il17ra,Il1r1,Lgals9,Lyn,Pik3ap1,Pik3cg,Pycard,Serping1,Socs3,Tgm2,Tlr2,Tlr4,Tnfrsf1a

**71 GO:0006909 phagocytosis** A 116 S 21 FDR 3.89E-12

Aif1,Bin2,C3,Cd47,Cyba,Dock2,Fcer1g,Fcgr1,Fcgr2b,Fcgr3,Ighm,Irf8,Itgb2,Nckap11,Pld4,Pros1,Pycard,Syk,Tgm2,Trem2,Vav1

**81 GO:0071310 cellular response to organic substance** A 1250 S 68 FDR 1.73E-11

Atf3,B2m,Calca,Cd109,Cd180,Cd44,Cd68,Cd74,Cebpa,Csf1r,Csf2rb,Cx3cr1,Cyba,Cyr61,Dab2,Edn2,Fcer1g,Fgf2,Fn1,Gbp2,Gbp3,Gbp6,Gbp7,Gbp9,Gpc3,H2-Q7,Icam1,Ifitm3,Il13ra1,Il17ra,Il1r1,Il6ra,Irf5,Irf8,Irgm2,Itgb2,Jak3,Junb,Ly86,Lyn,Mrc1,Msn,Myof,Ncf2,Nlrc5,Osmr,P2ry12,P2ry13,Pik3cg,Ptgr,Ptpn6,Ptpnc,Pycard,Socs3,Spidr,Stat3,Syk,Tgfb2,Timp2,Tlr2,Tlr4,Tmem173,Tnfrsf1a,Trem2,Ucp2,Vcam1,Vsir,Zc3hav1

**93 GO:0007166 cell surface receptor signaling pathway** A 1537 S 74 FDR 4.44E-10

Adgre1,Adgrg6,Atf3,Bag3,Bcl6,Btc,C3ar1,Cd109,Cd180,Cd22,Cd44,Cd53,Cd74,Cebpa,Cmtm3,Csf1r,Csf2rb,Cx3cr1,Cyr61,Dab2,Edn2,Fcer1g,Fcgr1,Fcgr2b,Fcgr3,Fgf2,Gpc3,Gpr34,H2-M3,Icam1,Ifitm3,Ighm,Il13ra1,Il1r1,Il6ra,Irf5,Itgam,Itgb2,Jak3,Klhl6,Kremen1,Lgals9,Lif,Ltbr,Ly86,Lyn,Myof,Nckap11,Nlrc5,Osmr,P2ry12,Pik3cd,Plcg2,Plxnd1,Ptpn6,Ptpnc,Pycard,S1pr2,Scube1,Siglec1,Socs3,Stat3,Syk,Tgfb2,Timp1,Tlr2,Tlr4,Tnfrsf1a,Trem2,Trf,Tyrobp,Vav1,Vsir,Wwtr1

**104 GO:0008284 positive regulation of cell proliferation** A 570 S 40 FDR 1.63E-09

Aif1,Atf3,Bcl6,Btc,C3ar1,Cd47,Cd74,Csf1r,Cx3cr1,Cyba,Cyr61,Edn2,Fgf2,Fn1,Gfap,Grn,H2-T23,Hpse,Ighm,Il6ra,Jak3,Lif,Lyn,Nckap11,Osmr,Ptgr,Ptpn6,Ptpnc,Pycard,Rac2,Rtkn2,Stat3,Syk,Tgfb2,Tgm2,Timp1,Tlr4,Trf,Vcam1,Wwtr1

**107 GO:0042113 B cell activation** A145 S 20 FDR 2.07E-09

Bcl3,Bcl6,Blnk,Cd180,Cd74,Fcgr2b,Ighm,Ikzf1,Inpp5d,Jak3,Lyn,Nckap11,Nfatc1,Pik3cd,Plcg2,Ptpn6,Ptprc,Skap2,Syk,Tlr4

**111 GO:0045785 positive regulation of cell adhesion** A 239 S 25 FDR 3.12E-09

Aif1,Calca,Cd44,Cd47,Cd74,Cyr61,Dab2,Fn1,H2-M3,H2-T23,Icam1,Ikzf1,Jak3,Lgals9,Myo10,Nckap11,Ptpn6,Ptprc,Pycard,Spp1,Syk,Tgfb2,Tgm2,Vav1,Vcam1

**114 GO:0002821 positive regulation of adaptive immune response** A 53 S 13 FDR 3.49E-09

B2m,C3,Cd44,Cd74,Fcer1g,Fcgr1,Fcgr3,H2-D1,H2-K1,H2-M3,H2-T23,Ptprc,Pycard

**116 GO:0002218 activation of innate immune response** A 78 S 15 FDR 4.77E-09

Cd180,Cyba,Ifih1,Lgals9,Lyn,Pik3ap1,Pycard,Rab7b,Tlr2,Tlr4,Tlr7,Tmem173,Tril,Trim30a,Unc93b1

**125 GO:1903039 positive regulation of leukocyte cell-cell adhesion** A 96 S 16 FDR 9.44E-09

Aif1,Cd44,Cd47,Cd74,H2-M3,H2-T23,Icam1,Ikzf1,Jak3,Lgals9,Nckap11,Ptprc,Pycard,Syk,Tgfb2,Vcam1

**127 GO:0030099 myeloid cell differentiation** A 254 S 25 FDR 9.87E-09

B2m,Bcl6,C1qc,Cd109,Cebpa,Clec2d,Csf1r,Dab2,Fli1,Gpc3,Ikzf1,Inpp5d,Irf8,Itgam,Junb,Lif,Ltbr,Lyn,Nckap11,Nfatc1,Ptpn6,Rab7b,Tgfb2,Trf,Tyrobp

**134 GO:0034341 response to interferon-gamma** A 38 S 11 FDR 1.32E-08

Bst2,Gbp2,Gbp3,Gbp6,Gbp7,Gbp9,H2-Q7,Ifitm3,Mrc1,Nlrc5,Parp9

**151 GO:0070372 regulation of ERK1 and ERK2 cascade** A 160 S 19 FDR 6.35E-08

Atf3,C3,Cd44,Cd74,Csf1r,Cyr61,Dab2,Fgf2,Fn1,Glipr2,Icam1,Lif,Lyn,Ptpn6,Pycard,Syk,Tlr2,Tlr4,Trem2

**156 GO:0032496 response to lipopolysaccharide** A 146 S 18 FDR 8.98E-08

B2m,Cd180,Gbp2,Gbp6,Irf8,Junb,Lgals9,Ltbr,Ly86,Lyn,Mrc1,Ncf2,Plcg2,Ptgrf,Pycard,Tlr4,Tnfrsf1a,Trem2

**180 GO:0007155 cell adhesion** A 1059 S 52 FDR 3.56E-07

Aif1,B2m,Bag3,Bcl3,Bcl6,Calca,Cd22,Cd33,Cd44,Cd47,Cd74,Cx3cr1,Cyr61,Dab2,Dock2,Fblim1,Fcer1g,Fn1,Gpmb,H2-M3,H2-T23,Hpse,Icam1,Ikzf1,Itgam,Itgb2,Jak3,Lad1,Lcp1,Lgals3bp,Lgals9,Lyn,Micall2,Myo10,Myo1f,Nckap11,P2ry12,Ptpn6,Ptprc,Pycard,Rac2,Siglec1,Spp1,Stab1,Syk,Tagln2,Tgfb2,Tgm2,Vav1,Vcam1,Vsir,Zc3hav1

**194 GO:0002718 regulation of cytokine production involved in immune response** A 32 S 9 FDR 5.32E-07

B2m,Bcl6,Cd74,Fcer1g,Jak3,Tlr2,Tlr4,Tril,Vsir

**196 GO:0046633 alpha-beta T cell proliferation** A 16 S 7 FDR 6.70E-07

Cd44,Dock2,H2-T23,Lgals9,Ptprc,Syk,Vsir

**204 GO:0032760 positive regulation of tumor necrosis factor production** A 45 S 10 FDR 9.76E-07

Cyba,Cybb,Fcer1g,Fcgr3,H2-T23,Lgals9,Pycard,Tlr2,Tlr4,Tnfrsf1a

**213 GO:0002495 antigen processing and presentation of peptide antigen via MHC class II**

A 11 S 6 FDR 1.28E-06 Cd74,Fcer1g,Fcgr2b,Pycard,Trem2,Unc93b1

**225 GO:0008285 negative regulation of cell proliferation** A 440 S29 FDR 2.10E-06

Aif1,Apoe,Bcl6,Cd109,Cd44,Cebpa,Csf1r,Dab2,Fcgr2b,Fgf2,Gpc3,H19,H2-M3,Hpgds,Ifitm3,Inpp5d,Lgals9,Lif,Lyn,Marveld3,Muc2,Nfatc1,Ptpn6,Skap2,Stat3,Tgfb2,Timp2,Tlr2,Vsir

**227 GO:0002429 immune response-activating cell surface receptor signaling pathway** A 77 S 12

FDR 2.34E-06 C3ar1,Cmtm3,Fcer1g,Ighm,Klhl6,Lyn,Nckap11,Plcg2,Ptpn6,Ptpnc,Syk,Tlr2

**228 GO:0030183 B cell differentiation** A 77 S 12 FDR 2.34E-06

Bcl3,Bcl6,Ighm,Ikzf1,Inpp5d,Jak3,Nckap11,Nfatc1,Plcg2,Ptpn6,Ptpnc,Syk

**234 GO:0045597 positive regulation of cell differentiation** A 695 S 38 FDR 2.46E-06

Apoe,Bcl6,Btc,Cd53,Cd74,Cebpa,Cebpd,Csf1r,Cx3cr1,Cyr61,Dab2,Fgf2,Fn1,Gfap,Glipr2,Grn,H2-M3,Ikzf1,Il1r1,Inpp5d,Junb,Lgals9,Lif,Lyn,Nckap11,Ptpnc,Rab7b,S1pr2,Socs3,Syk,Tgfb2,Timp2,Tlr2,Trf,Vsir,Wwtr1,Xlr3b,Zbtb7c

**266 GO:1902106 negative regulation of leukocyte differentiation** A 59 S10 FDR 1.11E-05

Bcl6,C1qc,Cd44,Cd74,Clec2d,H2-M3,Inpp5d,Jak3,Lyn,Tmem176a

**276 GO:0002275 myeloid cell activation involved in immune response** A 48 S 9 FDR 1.70E-05

Cx3cr1,Dock2,Fcer1g,Lyn,Myo1f,Pycard,Rac2,Syk,Tyrobp

**279 GO:0050731 positive regulation of peptidyl-tyrosine phosphorylation** A 112 S 13 FDR 1.90E-05

Agri,Cd44,Cd74,Csf1r,Icam1,Ighm,Il6ra,Lif,Lyn,Syk,Tlr4,Tnfrsfla,Trem2

**283 GO:0030335 positive regulation of cell migration** A 312 S 22 FDR 2.29E-05

Aif1,C3ar1,Cd74,Csf1r,Cyr61,Dab2,Edn2,Fgf2,Fn1,Glipr2,Icam1,Il1r1,Lgals9,Lyn,Myo1f,Nckap11,Pik3cd,Ptpnc,Pycard,Rac2,Tgfb2,Tlr2

**308 GO:0035456 response to interferon-beta** A 29 S 7 FDR 4.53E-05

Bst2,Gbp2,Gbp3,Gbp6,Ifitm3,Irgm2,Tmem173

**311 GO:0071222 cellular response to lipopolysaccharide** A 87 S 11 FDR 5.21E-05

B2m,Cd180,Gbp2,Gbp6,Irf8,Ly86,Lyn,Mrc1,Pycard,Tlr4,Trem2

**313 GO:0097028 dendritic cell differentiation** A 20 S 6 FDR 6.12E-05

H2-M3,Ltbr,Lyn,Tgfb2,Tmem176a,Trem2

**314 GO:0050707 regulation of cytokine secretion** A 72 S 10 FDR 6.34E-05

Csf1r,Fn1,Il17ra,Lgals9,Lyn,Pycard,Syk,Tlr2,Tlr4,Unc93b1

**321 GO:0042108 positive regulation of cytokine biosynthetic process** A 31 S 7 FDR 7.08E-05

Bcl3,Cybb,Fcgr3,Syk,Tlr2,Tlr4,Tlr7

**335 GO:0045582 positive regulation of T cell differentiation** A 45 S 8 FDR 9.02E-05

Cd74, H2-M3, Ikzf1, Lgals9, Nckap11, Ptpnc, Syk, Tgfb2

**341 GO:0042102 positive regulation of T cell proliferation** A 46 S 8 FDR 0.000105932

Aif1, H2-T23, Jak3, Nckap11, Ptpnc, Pycard, Syk, Vcam1

**345 GO:0015850 organic hydroxy compound transport** A 115 S 12 FDR 0.000128209

Abcc3, Apoe, Dab2, Fcer1g, Fcgr3, Ly6e, P2ry12, Ptgs1, Slc6a2, Slco2b1, Syk, Tlr2

**349 GO:0045577 regulation of B cell differentiation** A 23 S 6 FDR 0.000137301

Ikzf1, Inpp5d, Nckap11, Ptpn6, Ptpnc, Syk

**363 GO:0045824 negative regulation of innate immune response** A 25 S 6 FDR 0.00022278

A2m, Clec2d, H2-T23, Lgals9, Nlrc5, Serping1

**377 GO:0045453 bone resorption** A 39 S 7 FDR 0.000312042

Csflr, Ctss, Inpp5d, Rac2, Spp1, Syk, Trf

**384 GO:0009620 response to fungus** A 17 S 5 FDR 0.000402109

Il17ra, Ncf1, Pik3cd, Syk, Tlr2

**385 GO:0042554 superoxide anion generation** A 17 S 5 FDR 0.000402109

Cyba, Cybb, Ncf1, Ncf2, Syk

**387 GO:0007229 integrin-mediated signaling pathway** A 56 S 8 FDR 0.000416925

Dab2, Fcer1g, Itgam, Itgb2, Syk, Timp1, Tyrobp, Vav1

**391 GO:0002921 negative regulation of humoral immune response** A 9 S 4 FDR 0.000430345

A2m, Fcgr2b, Ptpn6, Serping1

**393 GO:0050855 regulation of B cell receptor signaling pathway** A 9 S 4 FDR 0.000430345

Cmtm3, Lyn, Ptpn6, Ptpnc

**394 GO:0061081 positive regulation of myeloid leukocyte cytokine production involved in immune response**

A 9 S 4 FDR 0.000430345 Cd74, Fcer1g, Tlr2, Tlr4

**397 GO:0002286 T cell activation involved in immune response** A 42 S 7 FDR 0.000482801

Bcl3, Bcl6, Fcer1g, H2-M3, Icam1, Jak3, Lcp1

**400 GO:0032729 positive regulation of interferon-gamma production** A 29 S 6 FDR 0.000514753

Bcl3, H2-M3, Irf8, Pycard, Tlr4, Tlr7

**401 GO:0032845 negative regulation of homeostatic process** A 134 S 12 FDR 0.000514753

Cd44, Cd74, Cyba, Fcer1g, Fcgr2b, Fgf2, Inpp5d, Lyn, Plcg2, Ptpn6, Ptpnc, Ucp2

**419 GO:0002283 neutrophil activation involved in immune response** A 10 S 4 FDR 0.00066226

Fcer1g, Myo1f, Syk, Tyrobp

**420 GO:0034134 toll-like receptor 2 signaling pathway** A 10 S 4 FDR 0.00066226

Cyba, Lyn, Pik3ap1, Tlr2

**421 GO:0034142 toll-like receptor 4 signaling pathway** A 19 S 5 FDR 0.00066226

Lyn, Pik3ap1, Rab7b, Tlr4, Tril

**427 GO:0007186 G-protein coupled receptor signaling pathway** A 400 S 22 FDR 0.000794173

Adgre1, Adgrg6, Apoe, C3, C3ar1, Calca, Cx3cr1, Edn2, Gna14, Gnb3, Gpr34, Kctd12, P2ry12, P2ry13, Pik3cg, Ptgr, Rac2, Rgs10, S1pr2, Syk, Tgm2, Vav1

**434 GO:0032735 positive regulation of interleukin-12 production** A 21 B 5 FDR 0.001099037

H2-M3, Irf8, Tlr2, Tlr4, Unc93b1

**440 GO:0050715 positive regulation of cytokine secretion** A 49 S 7 FDR 0.001223082

Csf1r, Il17ra, Lgals9, Pycard, Syk, Tlr2, Unc93b1

**446 GO:0001911 negative regulation of leukocyte mediated cytotoxicity** A 12 S 4 FDR 0.001431616

Clec2d, H2-T23, Lgals9, Ptprc

**447 GO:0002507 tolerance induction** A 12 S 4 FDR 0.001431616 C3ar1, H2-M3, Lyn, Tgfbr2

**460 GO:0002833 positive regulation of response to biotic stimulus** A 23 S 5 FDR 0.001599132

Cd180, Cyba, Lgals9, Ly86, Tlr2

**461 GO:0035458 cellular response to interferon-beta** A 23 S 5 FDR 0.001599132

Gbp2, Gbp3, Gbp6, Irgm2, Tmem173

**462 GO:0007204 positive regulation of cytosolic calcium ion concentration** A 154 S 12

FDR 0.001747672 C3ar1, Cyba, Edn2, Fgf2, Jak3, Lyn, Pik3cg, Plcg2, Ptgr, Ptpn6, Ptprc, Tgm2

**465 GO:0045576 mast cell activation** A 37 S 6 FDR 0.001894304 Fcer1g, Fcgr3, Lyn, Rac2, Syk, Tlr4

**466 GO:0002467 germinal center formation** A 13 S 4 FDR 0.001894304 Bcl3, Bcl6, Khlh6, Nfkb2

**477 GO:0032715 negative regulation of interleukin-6 production** A 25 S 5 FDR 0.002462463

Inpp5d, Nckap1l, Tlr4, Tnfrsf1a, Trim30a

**484 GO:0002576 platelet degranulation** A 6 S 3 FDR 0.002708082 Fcer1g, Lyn, Syk

**486 GO:0002890 negative regulation of immunoglobulin mediated immune response** A 6 S 3

FDR 0.002708082 Bcl6, Fcgr2b, Ptpn6

**487 GO:0002923 regulation of humoral immune response mediated by circulating immunoglobulin**

A 6 S 3 FDR 0.002708082 Fcgr2b, Ptpn6, Ptprc

**488 GO:0034162 toll-like receptor 9 signaling pathway** A 6 S 3 FDR 0.002708082

Pik3ap1, Rab7b, Unc93b1

**490 GO:0032608interferon-beta production** A 40 S 6 FDR 0.002708082  
 Ifih1, Pycard, Tlr2, Tlr4, Tlr7, Tmem173

**499 GO:0001773myeloid dendritic cell activation** A 15 S 4 FDR 0.003357545  
 Dock2, Ltbr, Pycard, Tgfb2

**500 GO:0045579 positive regulation of B cell differentiation** A 15 S 4 FDR 0.003357545  
 Ikzf1, Inpp5d, Nckap11, Syk

**502 GO:0001782B cell homeostasis** A 27 S 5 FDR 0.003357545 Cd44, Cd74, Lyn, Nckap11, Pik3cd

**503 GO:0010543regulation of platelet activation** A 27 S 5 FDR 0.003357545  
 Apoe, Fcgr1g, Lyn, Syk, Tlr4

**505 GO:0045123cellular extravasation** A 27 S 5 FDR 0.003357545 Icam1, Il1r1, Itgam, Itgb2, Vcam1

**511 GO:0048535lymph node development** A 16 S 4 FDR 0.004302724 Ikzf1, Jak3, Ltbr, Nfkb2

**516 GO:0032490detection of molecule of bacterial origin** A 7 S 3 FDR 0.004394846  
 Tlr2, Tlr4, Trem2

**519 GO:0060907positive regulation of macrophage cytokine production** A 7 S 3 FDR 0.004394846  
 Cd74, Tlr2, Tlr4

**528 GO:0002312B cell activation involved in immune response** A 45 S 6 FDR 0.004997966  
 Bcl3, Bcl6, Cd180, Plcg2, Ptprc, Tlr4

**530 GO:0043066negative regulation of apoptotic process** A 623 S 27 FDR 0.004997966  
 Aif1, Apoe, Bag3, Bcl3, Bcl6, Btc, Cd44, Cd74, Csf1r, Cx3cr1, Cyr61, Dab2, Fcgr1g, Fcgr2b, Fn1, Icam1, Jak3, Mt1, Nckap11, Pik3cg, Ptgfr, Socs3, Spp1, Stat3, Timp1, Tnfrsf1a, Ucp2

**532 GO:0045766positive regulation of angiogenesis** A 83 S 8 FDR 0.005236187  
 C3, C3ar1, Cx3cr1, Cybb, Fgf2, Itgb2, Tgfb2, Tnfrsf1a

**535 GO:0045730respiratory burst** A 17 S 4 FDR 0.005236187 Cyba, Cybb, Ncf1, Rac2

**542 GO:0070304 positive regulation of stress-activated protein kinase signaling cascade** A 105 S 9  
 FDR 0.00544059 Dab2, Fgd2, Gadd45b, Ltbr, Lyn, Pycard, Syk, Tlr4, Trf

**550 GO:0048661positive regulation of smooth muscle cell proliferation** A 66 S 7 FDR 0.006427544  
 Aif1, C3ar1, Cyba, Fgf2, Il6ra, Tgfb2, Tgm2

**552 GO:0001820serotonin secretion** A 8 S 3 FDR 0.006427544 Fcgr1g, Fcgr3, Syk

**553 GO:0006968cellular defense response** A 8 S 3 FDR 0.006427544 B2m, Clec2d, Ncf1

**554 GO:0032494response to peptidoglycan** A 8 S 3 FDR 0.006427544 Irf5, Tlr2, Trem2

**555 GO:0032736 positive regulation of interleukin-13 production** A 8 S 3 FDR 0.00642  
 H2-T23, Il17ra, Tlr4

**557 GO:0045060negative thymic T cell selection** A 8 S 3 FDR 0.006427544 Cd74,Dock2,Ptprc  
**558 GO:0050832defense response to fungus** A 8 S 3 FDR 0.006427544 Il17ra,Ncf1,Pik3cd  
**561 GO:0071404cellular response to low-density lipoprotein particle stimulus** A 8 S 3 FDR 0.006427544  
 Fcer1g,Itgb2,Syk  
**562 GO:0097459iron ion import into cell** A 8 S 3 FDR 0.006427544 B2m,Steap4,Trf  
**567 GO:0050728 negative regulation of inflammatory response** A 68 S 7 FDR 0.007671041  
 Apoe,Cd44,Cx3cr1,Fcgr2b,Lgals9,Socs3,Tnfrsf1a  
**568 GO:0046330positive regulation of JNK cascade** A 89 S 8 FDR 0.007787324  
 Dab2, Fgd2, Gadd45b, Ltbr, Pycard, Syk, Tlr4, Trf  
**569 GO:0002532production of molecular mediator involved in inflammatory response** A 33 S FDR 0.0078617  
 Fcer1g, Il17ra, Lyn, Syk, Tlr4  
**578 GO:0007565female pregnancy** A 70 S 7 FDR 0.008928028 A2m, Grn, H2-Q7, Junb, Lgals9, Lif, Timp1  
**579 GO:0031663lipopolysaccharide-mediated signaling pathway** A 34 S 5 0.72 FDR 0.009024345  
 Cd180, Ly86, Lyn, Tlr4, Trem2  
**580 GO:2001238positive regulation of extrinsic apoptotic signaling pathway** A 51 S 6 FDR 0.009024345  
 Atf3, Jak3, Ltbr, Ptprc, Pycard, Siglec1  
**582 GO:0032700negative regulation of interleukin-17 production** A 9 S 3 FDR 0.009152313  
 Nckap1l, Tlr2, Tlr4  
**585 GO:0046641positive regulation of alpha-beta T cell proliferation** A 9 S 3 FDR 0.009152313  
 H2-T23, Ptprc, Syk  
**590 GO:0001516prostaglandin biosynthetic process** A 20 S 4 FDR 0.009215  
 Cd74, Edn2, Hpgds, Ptgs1  
**595 GO:0042771intrinsic apoptotic signaling pathway in response to DNA damage by p53 class mediator**  
 A 35 S 5 FDR 0.009985485 Bcl3, Cd44, Cd74, Phlda3, Pycard  
**596 GO:0061045negative regulation of wound healing** A 35 S 5 FDR 0.009985485  
 Apoe, Cd109, Fgf2, Prosl, Serping1  
**597 GO:2000107negative regulation of leukocyte apoptotic process** A 35 S 5 FDR 0.009985485  
 Cd44, Cd74, Fcer1g, Fcgr2b, Jak3  
**604 GO:0043065positive regulation of apoptotic process** A 431 S 20 FDR 0.011210314  
 Agrn, Atf3, Bcl6, Cd44, Cyr61, Gadd45b, Inpp5d, Irf5, Jak3, Ltbr, Lyn, Muc2, Ncf2, Phlda3, Ptprc, Pycard, Siglec1, Tgm2, Tlr4, Tnfrsf1a  
**610 GO:0002281macrophage activation involved in immune response** A 10 S 3 FDR 0.012147722



Cx3cr1, Syk, Tyrobp

**612 GO:0002719 negative regulation of cytokine production involved in immune response** A 10 S 3 FDR 0.012147722 Bcl6, Jak3, Vsig3

**613 GO:0006953 acute-phase response** A 10 S 3 FDR 0.012147722 Fn1, Serpina3n, Stat3

**619 GO:2000778 positive regulation of interleukin-6 secretion** A 10 S 3 0.01214 Lgals9, Pycard, Unc93b1

**622 GO:0032757 positive regulation of interleukin-8 production** A 22 S 4 FDR 0.012738816

Pycard, Tlr2, Tlr4, Tlr

**625 GO:2000108 positive regulation of leukocyte apoptotic process** A 22 S 4 FDR 0.012738816

Cd44, Jak3, Lyn, Siglec1

**633 GO:0001961 positive regulation of cytokine-mediated signaling pathway** A 23 S 4 FDR 0.01492

Cd74, Il1r1, Nlrp5, Trem2

**637 GO:0043304 regulation of mast cell degranulation** A 23 S 4 FDR 0.014929168

Fcer1g, Lyn, Rac2, Syk

**642 GO:0002755 MyD88-dependent toll-like receptor signaling pathway** A 11 S 3 FDR 0.015651323

Tlr2, Tlr4, Tlr7

**646 GO:0042346 positive regulation of NF-kappaB import into nucleus** A 11 S 3 FDR 0.015651323

Tlr2, Tlr4, Tlr7

**647 GO:0045059 positive thymic T cell selection** A 11 S 3 FDR 0.015651323

Cd74, Dock2, Ptpnc

**648 GO:0045589 regulation of regulatory T cell differentiation** A 11 S 3 FDR 0.015651323

Cd44, H2-M3, Lgals9

**658 GO:0030225 macrophage differentiation** A 24 S 4 FDR 0.016926647 C1qc, Cebpa, Itgam, Lif

**660 GO:0045581 negative regulation of T cell differentiation** A 24 S 4 FDR 0.016926647

Bcl6, Cd44, Cd74, Jak3

**661 GO:0050798 activated T cell proliferation** A 24 S 4 FDR 0.0169 Itgam, Itgb2, Jak3, Pycard

**664 GO:0000187 activation of MAPK activity** A 80 S 7 FDR 0.017097711 Cd74, Dab2, Ighm, Ptpnc, Syk, Tlr4, Trf

**670 GO:0048260 positive regulation of receptor-mediated endocytosis** A 41 S 5 FDR 0.018485015

B2m, Dab2, Plcg2, Syk, Trf

**676 GO:0045058 T cell selection** A 25 S 4 FDR 0.019277356 Cd74, Dock2, Ptpnc, Syk

**678 GO:0051353 positive regulation of oxidoreductase activity** A 25 S 4 FDR 0.019277356

Apoe, Cyba, Edn2, Lgals9

- 682 GO:0002717positive regulation of natural killer cell mediated immunity** A 12 S 3 FDR 0.0192 H2-M3,H2-T23,Vav1
- 684 GO:0006910phagocytosis, recognition** A 12 S 3 FDR 0.019277356 Fcgr1, Fcgr3,Ighm
- 685 GO:0007252I-kappaB phosphorylation** A 12 S 3 FDR 0.019277356 Tlr2, Tlr4, Tlr7
- 686 GO:0007263nitric oxide mediated signal transduction** A 12 S 3 FDR 0.019277 Apoe,Mt1,Mt2
- 687 GO:0015682ferric iron transport** A 12 S 3 FDR 0.019277356 B2m,Steap4,Trf
- 690 GO:0030889negative regulation of B cell proliferation** A 12 S 3 FDR 0.0192 Fcgr2b,Inpp5d,Lyn
- 691 GO:0032727positive regulation of interferon-alpha production** A 12 S 3 FDR 0.0193 Ifih1,Tlr4,Tlr7
- 692 GO:0033630positive regulation of cell adhesion mediated by integrin** A 12 S 3 FDR 0.0193 Nckap1l,Ptpn6,Syk
- 694 GO:0045780positive regulation of bone resorption** A 12 S 3 FDR 0.01928 Spp1,Syk,Trf
- 699 GO:0010466negative regulation of peptidase activity** A 106 S 8 FDR 0.0199044  
A2m, Cd109,Cd44,Gpc3,Serpina3n,Serping1,Timp1,Timp2
- 712 GO:0015874norepinephrine transport** A 13 S 3 FDR 0.023853612 P2ry12, Ptgs1, Slc6a2
- 713 GO:0019730antimicrobial humoral response** A 13 S 3 FDR 0.02385 B2m, Bcl3, H2-T23
- 717 GO:2000406positive regulation of T cell migration** A 13 S 3 FDR 0.02385 Aif1,Lgals9,Pycard
- 718 GO:0007566embryo implantation** A 27 S 4 FDR 0.024504979 Grn,H2-Q7,Lif,Timp1
- 727 GO:0010575positive regulation of vascular endothelial growth factor production** A 14 S 3 FDR 0.029  
C3, C3ar1, Hpse
- 730 GO:0034122negative regulation of toll-like receptor signaling pathway** A 14 S 3 FDR 0.029  
Lyn, Rab7b,Trim30a
- 732 GO:0051209release of sequestered calcium ion into cytosol** A 67 S 6 FDR 0.029769604  
Cyba,Fgf2,Lyn,Plcg2,Ptpn6,Ptprc
- 734 GO:0002287alpha-beta T cell activation involved in immune response** A 29 S 4 FDR 0.031393687  
Bcl3, Bcl6,H2-M3,Jak3
- 739 GO:0045944positive regulation of transcription from RNA polymerase II promoter** A 759 S 28 FDR  
0.0318223Agrn,Atf3,Bcl3,Cebpa,Cebpd,Cyr61,Dab2,Fgf2,Fli1,Fosb,Hexb,Ikzf1,Irf5,Irf8,Jak3,Junb,Lif,Lpin3,Nfatc  
1,Nfkb2,Nlrc5,Stat3,Tlr2,Tlr4,Tmem173,Tnfrsf1a,Wwtr1,Zbtb7c
- 741 GO:0008360regulation of cell shape** A 116 S 8 FDR 0.033029744 Csf1r,  
Fblim1,Fn1,Hexb,Icam1,Msn,Myo10,Wipfl
- 747 GO:0032720negative regulation of tumor necrosis factor production** A 30 S 4 FDR 0.034  
Bcl3,Gpmb,Tlr4,Trim30a
- 753 GO:0051043regulation of membrane protein ectodomain proteolysis** A 15 S 3 FDR 0.035  
Apoe,Timp1,Timp2

**760 GO:0010718**positive regulation of epithelial to mesenchymal transition A 31 S 4 FDR 0.038744063  
 Dab2, Glipr2,Tgfr2,Wwtr1

**767 GO:0001778** plasma membrane repair A 5 S 2 FDR 0.040466379 Dysf, Myof

**769 GO:0002645**positive regulation of tolerance induction A 5 S 2 FDR 0.0405 H2-M3, Tgfr2

**770 GO:0002664**regulation of T cell tolerance induction A 5 S 2 FDR 0.040466379 H2-M3,Tgfr2

**772 GO:0032667**regulation of interleukin-23 production A 5 S 2 FDR 0.0404664 Il17ra,Tlr4

**773 GO:0032762**mast cell cytokine production A 5 S 2 FDR 0.040466379 Bcl6,Fcer1g

**774 GO:0034135**regulation of toll-like receptor 2 signaling pathway A 5 S 2 FDR 0.0405 Cyba,Lyn

**775 GO:0042270**protection from natural killer cell mediated cytotoxicity A 5 S 2 FDR 0.04047 Clec2d,  
 H2-T23

**776 GO:0045359**positive regulation of interferon-beta biosynthetic process A 5 S 2 FDR 0.0405 Tlr4,Tlr7

**777 GO:0046689**response to mercury ion A 5 S 2 FDR 0.0405 Fn1, Gatm

**778 GO:0050861**positive regulation of B cell receptor signaling pathway A 5 S 2 FDR 0.0405 Cmtm3,Lyn

**779 GO:0060100**positive regulation of phagocytosis, engulfment A 5 S 2 0.0405 Fcgr1, Nckap11

**780 GO:0061687**detoxification of inorganic compound A 5 S 2 FDR 0.0405 Mt1, Mt2

**781 GO:0070627**ferrous iron import A 5 S 2 FDR 0.0405 B2m, Trf

**785 GO:2000668**regulation of dendritic cell apoptotic process A 5 S 2 FDR 0.0405 Jak3,Lyn

**786 GO:2001179**regulation of interleukin-10 secretion A 5 S 2 FDR 0.0405 Lgals9, Pycard

**787 GO:2001198**regulation of dendritic cell differentiation A 5 S 2 FDR 0.0405 H2-M3, Tmem176a

**789 GO:0042517**positive regulation of tyrosine phosphorylation of Stat3 protein A 16 S 3 FDR 0.0405  
 Csf1r,Il6ra,Lif

**793 GO:0070373**negative regulation of ERK1 and ERK2 cascade A 51 S 5 FDR 0.041275763  
 Atf3,Dab2,Lif,Lyn,Tlr4

**800 GO:0045646**regulation of erythrocyte differentiation A 33 S 4 FDR 0.04653575  
 B2m, Inpp5d,Lyn,Nckap11

**805 GO:0048246**macrophage chemotaxis A 17 S 3 FDR 0.047528795 C3ar1,Cx3cr1,Edn2
