# Supplementary material for: Genetic Rescue of X-Linked Retinoschisis Mouse (Rs1−/y) Retina Induces Quiescence of the Retinal Microglial Inflammatory State Following AAV8-RS1 Gene Transfer and Identifies Gene Networks Underlying Retinal Recovery
Source: PubMed Central journal article supplement (PMC8312029; doi:10.1089/hum.2020.213), 2021-07-16
Supplement: Supp_Table5.pdf [file Supp_Table5.pdf]

**Table S5. Selected list of differentially expressed genes *Rs1*-KO vs. WT at P21**

| Gene symbol | Description                                                                       | Mouse Genome Informatics ID <sup>a</sup> | Log <sub>2</sub> FC <sup>b</sup> | P.Value  | adj.P.Value <sup>c</sup> |
|-------------|-----------------------------------------------------------------------------------|------------------------------------------|----------------------------------|----------|--------------------------|
|             | <b>MICROGLIA</b>                                                                  |                                          |                                  |          |                          |
| Aif1        | allograft inflammatory factor 1                                                   | <a href="#">MGI:1343098</a>              | 2.34                             | 2.07E-05 | 1.01E-03                 |
| Apoe        | apolipoprotein E                                                                  | <a href="#">MGI:88057</a>                | 1.02                             | 1.27E-04 | 2.77E-03                 |
| Tgfr2       | transforming growth factor, beta receptor II                                      | <a href="#">MGI:98729</a>                | 1.33                             | 5.34E-05 | 1.71E-03                 |
| Cybb        | cytochrome b-245, beta polypeptide                                                | <a href="#">MGI:88574</a>                | 2.82                             | 4.20E-05 | 1.49E-03                 |
| Clec7a      | C-type lectin domain family 7, member a                                           | <a href="#">MGI:1861431</a>              | 4.32                             | 3.52E-06 | 3.14E-04                 |
| Csf1r       | colony stimulating factor 1 receptor                                              | <a href="#">MGI:1339758</a>              | 2.34                             | 3.49E-08 | 2.63E-05                 |
| Cx3cr1      | chemokine (C-X3-C motif) receptor 1                                               | <a href="#">MGI:1333815</a>              | 2.21                             | 5.30E-08 | 2.67E-05                 |
| Fcrls       | Fc receptor-like S, scavenger receptor                                            | <a href="#">MGI:1933397</a>              | 3.68                             | 2.28E-08 | 2.53E-05                 |
| Gpr34       | G protein-coupled receptor 34                                                     | <a href="#">MGI:1346334</a>              | 2.18                             | 9.78E-07 | 1.55E-04                 |
| Gpnmb       | glycoprotein (transmembrane) nmb                                                  | <a href="#">MGI:1934765</a>              | 2.94                             | 1.69E-05 | 8.98E-04                 |
| Hexb        | hexosaminidase B                                                                  | <a href="#">MGI:96074</a>                | 1.42                             | 2.87E-07 | 8.08E-05                 |
| Il10ra      | interleukin 10 receptor, alpha                                                    | <a href="#">MGI:96538</a>                | 2.30                             | 9.92E-07 | 1.56E-04                 |
| P2ry13      | purinergic receptor P2Y, G-protein coupled 13                                     | <a href="#">MGI:1921441</a>              | 1.78                             | 1.92E-05 | 9.72E-04                 |
| P2ry12      | purinergic receptor P2Y, G-protein coupled 12                                     | <a href="#">MGI:1918089</a>              | 1.03                             | 2.47E-04 | 3.98E-03                 |
| Siglec1     | sialic acid binding Ig-like lectin 1, sialoadhesin                                | <a href="#">MGI:99668</a>                | 1.42                             | 2.19E-04 | 3.72E-03                 |
| Spp1        | secreted phosphoprotein 1                                                         | <a href="#">MGI:98389</a>                | 2.19                             | 3.78E-04 | 5.00E-03                 |
| Trem2       | triggering receptor expressed on myeloid cells 2                                  | <a href="#">MGI:1913150</a>              | 3.30                             | 1.81E-08 | 2.08E-05                 |
|             | <b>The inflammatory response to cell death</b>                                    |                                          |                                  |          |                          |
| Bcl3        | B cell leukemia/lymphoma 3                                                        | <a href="#">MGI:88140</a>                | 5.05                             | 3.53E-07 | 8.77E-05                 |
| C1qa        | complement component 1, q subcomponent alpha                                      | <a href="#">MGI:88223</a>                | 2.61                             | 8.00E-09 | 1.17E-05                 |
| C1qb        | complement component 1, q subcomponent, beta                                      | <a href="#">MGI:88224</a>                | 2.75                             | 2.11E-08 | 2.20E-05                 |
| C1qc        | complement component 1, q subcomponent, C                                         | <a href="#">MGI:88225</a>                | 2.91                             | 6.05E-08 | 2.85E-05                 |
| C3          | complement component 3                                                            | <a href="#">MGI:88227</a>                | 2.40                             | 6.45E-05 | 1.9E-03                  |
| C4b         | complement component 4B                                                           | <a href="#">MGI:88228</a>                | 4.98                             | 7.95E-10 | 2.90E-06                 |
| C3ar1       | complement component 3a receptor 1                                                | <a href="#">MGI:1097680</a>              | 4.68                             | 1.89E-06 | 2.22E-04                 |
| Edn2        | endothelin 2 [                                                                    | <a href="#">MGI:95284</a>                | 5.32                             | 8.40E-11 | 5.19E-07                 |
| Il6ra       | interleukin 6 receptor, alpha                                                     | <a href="#">MGI:105304</a>               | 2.01                             | 8.21E-06 | 5.48E-04                 |
| Il10ra      | interleukin 10 receptor, alpha                                                    | <a href="#">MGI:96538</a>                | 2.29                             | 9.92E-07 | 1.55E-04                 |
| Il17ra      | interleukin 17 receptor A                                                         | <a href="#">MGI:107399</a>               | 1.35                             | 2.08E-06 | 2.37E-04                 |
| Nlrp5       | NLR family, CARD domain containing 5                                              | <a href="#">MGI:3612191</a>              | 2.83                             | 5.82E-05 | 1.80E-03                 |
|             | <b>Innate Immunity</b>                                                            |                                          |                                  |          |                          |
| Tlr2        | toll-like receptor 2                                                              | <a href="#">MGI:1346060</a>              | 2.15                             | 7.22E-05 | 2.00E-03                 |
| Tlr4        | toll-like receptor 4                                                              | <a href="#">MGI:96824</a>                | 1.36                             | 4.9E-04  | 5.90E-03                 |
| Tlr9        | toll-like receptor 7                                                              | <a href="#">MGI:2176882</a>              | 3.56                             | 1.92E-04 | 3.48E-03                 |
|             | <b>Cluster of differentiation (CD) antigens</b>                                   |                                          |                                  |          |                          |
| Cd33        | CD33 antigen                                                                      | <a href="#">MGI:99440</a>                | 2.80                             | 1.84E-05 | 9.51E-04                 |
| Cd52        | Cd52                                                                              | <a href="#">MGI:1346088</a>              | 2.50                             | 1.76E-05 | 9.20E-04                 |
| Cd53        | CD53 antigen                                                                      | <a href="#">MGI:88341</a>                | 2.86                             | 5.01E-08 | 2.63E-05                 |
| Cd68        | CD68 antigen                                                                      | <a href="#">MGI:88342</a>                | 3.17                             | 1.32E-05 | 7.59E-04                 |
| Cd74        | antigen (MHC class II antigen-associated)                                         | <a href="#">MGI:96534</a>                | 2.99                             | 4.2E-04  | 5.3E-03                  |
| Cd180       | CD180 antigen                                                                     | <a href="#">MGI:1194924</a>              | 2.82                             | 5.16E-06 | 4.10E-04                 |
|             | <b>Extracellular Matrix Degradation and Remodeling in Development and Disease</b> |                                          |                                  |          |                          |
| Adamts15    | adamts-like 5                                                                     | <a href="#">MGI:1913798</a>              | 1.05                             | 3.59E-04 | 4.9E-03                  |
| Fgf2        | fibroblast growth factor 2                                                        | <a href="#">MGI:95516</a>                | 3.14                             | 1.17E-07 | 4.27E-05                 |
| Timp1       | tissue inhibitor of metalloproteinase 1                                           | <a href="#">MGI:98752</a>                | 2.20                             | 6.45E-05 | 1.9E-03                  |
| Timp2       | tissue inhibitor of metalloproteinase 2                                           | <a href="#">MGI:98753</a>                | 1.00                             | 2.41E-06 | 2.5E-04                  |
|             | <b>Other cell surface molecules</b>                                               |                                          |                                  |          |                          |
| Fcrlg       | Fc receptor, IgE, high affinity I, gamma polypeptide                              | <a href="#">MGI:95496</a>                | 2.17                             | 1.27E-05 | 7.46E-04                 |
| Itgb2       | integrin beta 2                                                                   | <a href="#">MGI:96611</a>                | 2.71                             | 5.07E-06 | 4.06E-04                 |
| Icam1       | intercellular adhesion molecule 1                                                 | <a href="#">MGI:96392</a>                | 1.99                             | 1.09E-05 | 6.72E-04                 |
| Lgals9      | lectin, galactose binding, soluble 9                                              | <a href="#">MGI:109496</a>               | 1.43                             | 9.83E-05 | 2.38E-04                 |
| Rab7b       | Rab7b, member RAS oncogene family                                                 | <a href="#">MGI:2442295</a>              | 2.04                             | 1.28E-05 | 7.47E-04                 |
| Sla         | src-like adaptor                                                                  | <a href="#">MGI:104295</a>               | 1.17                             | 7.32E-07 | 1.35E-04                 |
| Vcam1       | vascular cell adhesion molecule 1                                                 | <a href="#">MGI:98926</a>                | 2.76                             | 9.44E-06 | 6.10E-04                 |

|          |                                                          |                             |       |          |          |
|----------|----------------------------------------------------------|-----------------------------|-------|----------|----------|
| Zan      | zonadhesin                                               | <a href="#">MGI:106656</a>  | -1.28 | 3.29E-06 | 3.03E-04 |
|          | <b>TMEM132: A new family of neural adhesion molecule</b> |                             |       |          |          |
| Tmem26   | transmembrane protein 26                                 | <a href="#">MGI:2143537</a> | 1.25  | 7.73E-05 | 2.01E-03 |
| Tmem71   | transmembrane protein 71                                 | <a href="#">MGI:2146049</a> | 1.93  | 6.88E-05 | 2.00E-03 |
| Tmem98   | transmembrane protein 98                                 | <a href="#">MGI:1923457</a> | 1.31  | 7.29E-05 | 2.00E-03 |
| Tmem132b | transmembrane protein 132B                               | <a href="#">MGI:3609245</a> | 1.07  | 1.25E-04 | 2.76E-03 |
| Tmem173  | transmembrane protein 173 [                              | <a href="#">MGI:1919762</a> | 1.32  | 2.10E-04 | 3.66E-03 |
| Tmem176a | transmembrane protein 176A                               | <a href="#">MGI:1913308</a> | 1.10  | 1.55E-05 | 8.51E-04 |
|          | <b>Cytokine Signaling-Transcription Factors</b>          |                             |       |          |          |
| Atf3     | activating transcription factor 3                        | <a href="#">MGI:109384</a>  | 1.79  | 2.68E-06 | 2.66E-04 |
| Cx3cr1   | chemokine (C-X3-C motif) receptor 1                      | <a href="#">MGI:1333815</a> | 2.21  | 5.30E-08 | 2.67E-05 |
| Fosb     | FBJ osteosarcoma oncogene B                              | <a href="#">MGI:95575</a>   | 1.70  | 1.77E-4  | 3.33E-03 |
| Irf5     | interferon regulatory factor 5                           | <a href="#">MGI:1350924</a> | 1.58  | 4.76E-05 | 1.59E-03 |
| Irf8     | interferon regulatory factor 8                           | <a href="#">MGI:96395</a>   | 1.78  | 5.63E-05 | 1.77E-03 |
| Jak3     | Janus kinase 3                                           | <a href="#">MGI:99928</a>   | 2.85  | 4.76E-08 | 2.63E-05 |
| Junb     | jun B proto-oncogene                                     | <a href="#">MGI:96647</a>   | 1.33  | 8.88E-07 | 1.49E-04 |
| Il6ra    | interleukin 6 receptor, alpha                            | <a href="#">MGI:105304</a>  | 2.01  | 8.21E-6  | 5.48E-04 |
| P2ry12   | purinergic receptor P2Y, G-protein coupled 12            | <a href="#">MGI:1918089</a> | 1.03  | 2.46E-04 | 3.97E-03 |
| Stat3    | signal transducer and activator of transcription 3       | <a href="#">MGI:103038</a>  | 1.62  | 6.35E-07 | 1.11E-04 |

Abbreviations: a-MGI-Mouse Genome Informatics; b-log<sub>2</sub>FC-fold change expressed as log<sub>2</sub> base; c-adj.P.Value: p value adjusted using Benjamini Hochberg method implemented in edgeR
