# Supplementary material for: Genetic Rescue of X-Linked Retinoschisis Mouse (Rs1−/y) Retina Induces Quiescence of the Retinal Microglial Inflammatory State Following AAV8-RS1 Gene Transfer and Identifies Gene Networks Underlying Retinal Recovery
Source: PubMed Central journal article supplement (PMC8312029; doi:10.1089/hum.2020.213), 2021-07-16
Supplement: Supp_Table6.pdf [file Supp_Table6.pdf]

**Table S 6. Complete List of Significantly Differentially Expressed Gene (DEGs) List. G7 vs. C7 (*Rs1-KO-AAV8-RS1 vs. Rs1-KO-AAV8-Null at post injection day 7*)**

| Gene                    | Transcript Count | log FC   | log CPM  | P. Value | FDR      |
|-------------------------|------------------|----------|----------|----------|----------|
| <a href="#">Mfsd10</a>  | 21               | -0.6466  | 3.806755 | 5.18E-07 | 3.82E-05 |
| <a href="#">Col6a1</a>  | 2                | -1.00548 | 5.733852 | 1.77E-23 | 7.49E-20 |
| <a href="#">Cfp</a>     | 2                | -0.64075 | 3.702949 | 1.14E-07 | 1.01E-05 |
| <a href="#">Tcirg1</a>  | 13               | -0.82201 | 3.402773 | 6.57E-10 | 1.41E-07 |
| <a href="#">Spag5</a>   | 8                | -0.60989 | 6.198976 | 5.12E-10 | 1.14E-07 |
| <a href="#">Pon1</a>    | 4                | 1.047961 | 3.908572 | 0.0012   | 0.019421 |
| <a href="#">Akap8l</a>  | 1                | -0.5955  | 6.370557 | 1.70E-08 | 1.97E-06 |
| <a href="#">Irf3</a>    | 13               | -0.69845 | 5.596849 | 8.02E-14 | 5.65E-11 |
| <a href="#">Car11</a>   | 5                | -0.74434 | 4.684609 | 1.21E-10 | 3.12E-08 |
| <a href="#">Nqo1</a>    | 1                | 0.692777 | 2.779307 | 9.34E-06 | 0.000427 |
| <a href="#">Mettl17</a> | 16               | -0.63213 | 4.914896 | 3.93E-13 | 2.49E-10 |
| <a href="#">Stxbp2</a>  | 15               | -0.59427 | 5.35059  | 3.83E-09 | 6.52E-07 |
| <a href="#">Tyr</a>     | 3                | 1.017343 | 4.257609 | 7.61E-07 | 5.14E-05 |
| <a href="#">Dgkq</a>    | 11               | -0.75819 | 4.521357 | 5.62E-11 | 1.62E-08 |
| <a href="#">Bcan</a>    | 6                | -0.73075 | 2.624759 | 3.62E-07 | 2.80E-05 |
| <a href="#">Rasa4</a>   | 13               | -0.71025 | 5.099791 | 4.44E-14 | 3.76E-11 |
| <a href="#">Tyrop1</a>  | 4                | 0.873355 | 5.533343 | 1.22E-05 | 0.000516 |
| <a href="#">Fpgs</a>    | 10               | -0.68455 | 2.974727 | 3.39E-08 | 3.47E-06 |
| <a href="#">Taz</a>     | 22               | -0.69504 | 6.154963 | 1.23E-13 | 8.18E-11 |
| <a href="#">Rnf112</a>  | 7                | -0.63089 | 4.279835 | 3.46E-09 | 6.19E-07 |
| <a href="#">Dennd6b</a> | 6                | -0.79319 | 6.578113 | 3.04E-17 | 3.85E-14 |
| <a href="#">Cltrn</a>   | 3                | 0.991324 | 3.704652 | 1.62E-05 | 0.000647 |
| <a href="#">Col20a1</a> | 5                | -0.61992 | 4.690585 | 2.04E-11 | 7.83E-09 |
| <a href="#">Pipox</a>   | 3                | -0.62768 | 2.413175 | 2.68E-05 | 0.000989 |
| <a href="#">Etv4</a>    | 12               | -0.7172  | 2.299034 | 6.64E-07 | 4.71E-05 |
| <a href="#">Syne4</a>   | 17               | -1.25453 | 2.645041 | 1.74E-20 | 4.42E-17 |
| <a href="#">Smpdl3a</a> | 3                | 0.609292 | 3.244342 | 0.000234 | 0.005396 |
| <a href="#">Smtn</a>    | 10               | -0.58776 | 2.909681 | 5.32E-05 | 0.001697 |
| <a href="#">Coro6</a>   | 6                | -0.59527 | 2.549055 | 2.33E-05 | 0.000882 |
| <a href="#">Adam11</a>  | 9                | -0.59834 | 5.682396 | 3.86E-09 | 6.52E-07 |
| <a href="#">Dct</a>     | 4                | 0.838739 | 7.021643 | 0.000406 | 0.008372 |
| <a href="#">Carmil3</a> | 12               | -0.59749 | 5.697834 | 1.95E-07 | 1.63E-05 |
| <a href="#">Trmu</a>    | 9                | -0.59376 | 4.348969 | 4.11E-09 | 6.86E-07 |
| <a href="#">Enpp2</a>   | 9                | 0.672736 | 7.012827 | 0.000511 | 0.009965 |
| <a href="#">Cldn1</a>   | 2                | 0.831158 | 3.96611  | 0.000211 | 0.004978 |
| <a href="#">Aifm3</a>   | 6                | -1.02147 | 2.805262 | 3.16E-11 | 1.03E-08 |
| <a href="#">Clic6</a>   | 2                | 0.754984 | 4.357311 | 0.00017  | 0.004224 |
| <a href="#">Gps2</a>    | 5                | -0.68731 | 4.793138 | 9.03E-13 | 4.98E-10 |

|                          |    |          |          |          |          |
|--------------------------|----|----------|----------|----------|----------|
| <a href="#">Rgs11</a>    | 11 | -1.06195 | 6.238859 | 2.00E-25 | 1.27E-21 |
| <a href="#">Adamts10</a> | 12 | -0.62562 | 4.736761 | 3.38E-06 | 0.000176 |
| <a href="#">Col11a2</a>  | 8  | -0.92678 | 3.973882 | 4.14E-06 | 0.000208 |
| <a href="#">Vps51</a>    | 10 | -0.73983 | 3.542695 | 2.66E-11 | 9.43E-09 |
| <a href="#">Rps6kb2</a>  | 11 | -0.5969  | 3.758842 | 1.16E-05 | 0.000502 |
| <a href="#">Doc2g</a>    | 4  | -0.71112 | 2.524208 | 2.26E-06 | 0.000129 |
| <a href="#">Map4k2</a>   | 22 | -0.64356 | 4.968698 | 5.76E-09 | 8.21E-07 |
| <a href="#">Col17a1</a>  | 4  | -0.66164 | 3.522819 | 6.73E-05 | 0.002029 |
| <a href="#">Lrrc45</a>   | 5  | -0.73405 | 5.138772 | 2.75E-11 | 9.43E-09 |
| <a href="#">Hps1</a>     | 9  | -0.67166 | 2.943284 | 4.60E-06 | 0.000229 |
| <a href="#">Alas2</a>    | 4  | 1.077035 | 3.181115 | 0.000188 | 0.004606 |
| <a href="#">Itgb8</a>    | 3  | 0.648534 | 6.719774 | 4.94E-05 | 0.001603 |
| <a href="#">Pmel</a>     | 3  | 1.10072  | 5.182524 | 1.17E-05 | 0.000502 |
| <a href="#">Col7a1</a>   | 8  | -1.40898 | 4.866466 | 3.46E-19 | 6.27E-16 |
| <a href="#">Rhbd11</a>   | 3  | -0.62933 | 3.315575 | 1.51E-08 | 1.85E-06 |
| <a href="#">Spopl</a>    | 6  | 0.627493 | 4.344876 | 1.19E-05 | 0.000509 |
| <a href="#">Ernm</a>     | 1  | 0.998777 | 3.345858 | 0.00116  | 0.018937 |
| <a href="#">Col5a1</a>   | 2  | -0.65677 | 4.058636 | 4.10E-07 | 3.11E-05 |
| <a href="#">Notch1</a>   | 11 | -0.59794 | 5.957196 | 1.21E-05 | 0.000512 |
| <a href="#">Arrdc1</a>   | 12 | -0.59454 | 2.743461 | 0.000203 | 0.004829 |
| <a href="#">Cdc25b</a>   | 7  | -0.79201 | 3.095343 | 3.95E-06 | 0.0002   |
| <a href="#">Ampd2</a>    | 10 | -0.69201 | 6.050799 | 5.73E-13 | 3.46E-10 |
| <a href="#">Col11a1</a>  | 7  | -0.70196 | 4.3696   | 5.86E-06 | 0.000285 |
| <a href="#">Lrat</a>     | 1  | 1.005592 | 4.667314 | 0.001536 | 0.023368 |
| <a href="#">Adam15</a>   | 13 | -0.67808 | 4.979713 | 9.07E-11 | 2.45E-08 |
| <a href="#">Thbs3</a>    | 11 | -0.87547 | 2.50863  | 4.97E-06 | 0.000244 |
| <a href="#">Rpe65</a>    | 3  | 1.048371 | 5.658503 | 0.001855 | 0.027053 |
| <a href="#">Ccdc163</a>  | 14 | -0.63003 | 4.81215  | 1.11E-12 | 5.87E-10 |
| <a href="#">Sema3c</a>   | 5  | 0.849873 | 3.694835 | 0.000849 | 0.014878 |
| <a href="#">Miip</a>     | 8  | -0.63034 | 4.650082 | 1.18E-10 | 3.12E-08 |
| <a href="#">P2rx2</a>    | 6  | -0.7808  | 2.234974 | 4.64E-07 | 3.44E-05 |
| <a href="#">Gm20605</a>  | 1  | -0.89561 | 6.253866 | 4.63E-12 | 2.18E-09 |
| <a href="#">Pon3</a>     | 6  | 0.62468  | 2.408495 | 0.000454 | 0.009122 |
| <a href="#">Gpnmb</a>    | 5  | 0.623396 | 5.955434 | 0.000603 | 0.011424 |
| <a href="#">Oca2</a>     | 6  | 0.95785  | 2.627381 | 0.000111 | 0.003032 |
| <a href="#">Cln3</a>     | 19 | -0.64703 | 4.714408 | 1.45E-08 | 1.80E-06 |
| <a href="#">Cpxm2</a>    | 5  | 0.869641 | 4.231233 | 0.000172 | 0.004266 |
| <a href="#">Cacna1f</a>  | 11 | -0.67791 | 8.443478 | 1.22E-06 | 7.73E-05 |
| <a href="#">Zmyx3</a>    | 18 | -0.76086 | 6.926187 | 4.66E-10 | 1.06E-07 |
| <a href="#">Flna</a>     | 15 | -0.66816 | 7.147688 | 2.27E-08 | 2.44E-06 |
| <a href="#">Plxna3</a>   | 9  | -0.8042  | 4.727981 | 5.62E-11 | 1.62E-08 |
| <a href="#">Dock6</a>    | 8  | -0.75477 | 3.570279 | 1.78E-05 | 0.000699 |
| <a href="#">Man2c1</a>   | 23 | -0.72761 | 5.718804 | 2.95E-16 | 3.40E-13 |
| <a href="#">Car12</a>    | 6  | 1.124159 | 3.915901 | 0.000294 | 0.006484 |

|                               |    |          |          |          |          |
|-------------------------------|----|----------|----------|----------|----------|
| <a href="#">Col6a4</a>        | 4  | -1.05117 | 2.756552 | 3.95E-15 | 3.86E-12 |
| <a href="#">Slc16a8</a>       | 2  | 0.91719  | 3.666944 | 0.000555 | 0.010696 |
| <a href="#">Cpsf1</a>         | 20 | -0.60387 | 6.208659 | 1.86E-11 | 7.36E-09 |
| <a href="#">Ssh3</a>          | 2  | -0.60117 | 4.173718 | 1.73E-07 | 1.47E-05 |
| <a href="#">Mfrp</a>          | 6  | 0.590917 | 5.47568  | 0.003916 | 0.046781 |
| <a href="#">Tle6</a>          | 14 | -0.59398 | 3.601157 | 2.42E-06 | 0.000135 |
| <a href="#">Tle2</a>          | 16 | -0.96523 | 5.051988 | 6.71E-14 | 5.00E-11 |
| <a href="#">Cpne7</a>         | 5  | -0.67203 | 4.10899  | 6.57E-09 | 9.26E-07 |
| <a href="#">Leng8</a>         | 10 | -0.70625 | 8.490044 | 2.38E-06 | 0.000134 |
| <a href="#">Dok3</a>          | 3  | -0.59673 | 2.977119 | 7.03E-05 | 0.002109 |
| <a href="#">Snapc4</a>        | 14 | -0.7587  | 5.027828 | 6.18E-13 | 3.56E-10 |
| <a href="#">Cenpt</a>         | 10 | -0.6518  | 3.789997 | 1.61E-08 | 1.88E-06 |
| <a href="#">Slc6a20a</a>      | 3  | 1.077082 | 3.959879 | 2.77E-05 | 0.001019 |
| <a href="#">Slc39a12</a>      | 3  | 0.709278 | 2.890012 | 2.88E-05 | 0.001049 |
| <a href="#">Tns2</a>          | 9  | -0.60244 | 4.021233 | 9.71E-07 | 6.39E-05 |
| <a href="#">BC030499</a>      | 6  | -0.6555  | 6.994181 | 3.58E-09 | 6.21E-07 |
| <a href="#">Slc16a9</a>       | 2  | 0.894145 | 3.476427 | 1.04E-08 | 1.38E-06 |
| <a href="#">Asic3</a>         | 5  | -0.95746 | 5.136069 | 7.81E-26 | 9.90E-22 |
| <a href="#">Rtel1</a>         | 21 | -0.89654 | 5.295476 | 8.73E-23 | 2.77E-19 |
| <a href="#">Ciz1</a>          | 22 | -0.66028 | 6.026837 | 1.07E-08 | 1.40E-06 |
| <a href="#">Tbce</a>          | 13 | -0.5902  | 5.93944  | 5.30E-11 | 1.62E-08 |
| <a href="#">Tspan10</a>       | 2  | 0.773804 | 3.271151 | 0.000141 | 0.003664 |
| <a href="#">Abcc8</a>         | 8  | -0.70049 | 4.059813 | 2.38E-07 | 1.93E-05 |
| <a href="#">Thbs1</a>         | 2  | 0.886904 | 5.494896 | 7.73E-05 | 0.002271 |
| <a href="#">Sec1</a>          | 1  | -0.74177 | 2.769915 | 1.19E-06 | 7.60E-05 |
| <a href="#">Slc26a7</a>       | 4  | 0.766452 | 4.051476 | 0.000145 | 0.003741 |
| <a href="#">Bace2</a>         | 4  | 0.642144 | 3.42272  | 0.000705 | 0.012869 |
| <a href="#">Slc16a11</a>      | 11 | -0.7111  | 2.407928 | 5.50E-07 | 4.01E-05 |
| <a href="#">Rgl2</a>          | 12 | -0.81043 | 5.350904 | 5.95E-14 | 4.72E-11 |
| <a href="#">Kank3</a>         | 6  | -0.71434 | 3.738779 | 1.86E-08 | 2.11E-06 |
| <a href="#">Ccdc84</a>        | 12 | -0.59325 | 4.196262 | 3.54E-09 | 6.21E-07 |
| <a href="#">Col27a1</a>       | 7  | -0.74741 | 4.156447 | 1.02E-11 | 4.47E-09 |
| <a href="#">Mtmr11</a>        | 7  | -0.99975 | 3.694086 | 6.26E-18 | 9.93E-15 |
| <a href="#">Serinc4</a>       | 6  | -0.59552 | 5.62082  | 2.97E-12 | 1.45E-09 |
| <a href="#">Atg16l2</a>       | 17 | -0.59564 | 4.081562 | 4.35E-08 | 4.19E-06 |
| <a href="#">Tpcn2</a>         | 8  | -0.71898 | 2.648486 | 4.22E-07 | 3.19E-05 |
| <a href="#">Gemin4</a>        | 2  | -0.70387 | 2.855254 | 0.000144 | 0.003732 |
| <a href="#">2310061I04Rik</a> | 9  | -0.59008 | 4.827695 | 5.19E-09 | 7.90E-07 |
| <a href="#">Hbb-bs</a>        | 3  | 1.18465  | 8.277281 | 0.000301 | 0.006569 |
| <a href="#">Lgals4</a>        | 7  | -0.82042 | 3.262563 | 7.36E-11 | 2.03E-08 |
| <a href="#">Tdrd9</a>         | 6  | -0.99294 | 4.439259 | 2.56E-17 | 3.61E-14 |
| <a href="#">Pld5</a>          | 6  | 0.6095   | 2.793612 | 9.43E-05 | 0.002658 |
| <a href="#">Izumo4</a>        | 13 | -0.71318 | 3.61917  | 1.02E-09 | 2.11E-07 |
| <a href="#">Tmem150a</a>      | 5  | -0.66378 | 2.400188 | 1.74E-05 | 0.000686 |

|                               |    |          |          |          |          |
|-------------------------------|----|----------|----------|----------|----------|
| <a href="#">Col8a2</a>        | 2  | 0.929066 | 4.099155 | 0.001823 | 0.026731 |
| <a href="#">Snx32</a>         | 1  | -0.78134 | 5.664611 | 1.03E-19 | 2.17E-16 |
| <a href="#">Ccdc189</a>       | 5  | -0.63909 | 2.870253 | 2.99E-07 | 2.36E-05 |
| <a href="#">Kcnt1</a>         | 15 | -0.89631 | 4.986778 | 3.13E-14 | 2.83E-11 |
| <a href="#">Csf2ra</a>        | 1  | -0.70679 | 4.664171 | 7.10E-12 | 3.21E-09 |
| <a href="#">Gckr</a>          | 7  | -0.71251 | 7.553238 | 6.70E-09 | 9.33E-07 |
| <a href="#">Arr3</a>          | 7  | -0.78574 | 7.724154 | 3.91E-10 | 9.19E-08 |
| <a href="#">Clasrp</a>        | 13 | -0.60121 | 5.358459 | 4.43E-07 | 3.32E-05 |
| <a href="#">Cdh3</a>          | 1  | 0.612679 | 2.707834 | 0.000667 | 0.012424 |
| <a href="#">Ttr</a>           | 1  | 1.108086 | 8.004403 | 0.000757 | 0.013635 |
| <a href="#">Ppox</a>          | 8  | -0.63959 | 5.778142 | 1.79E-11 | 7.32E-09 |
| <a href="#">Hdac10</a>        | 8  | -0.66253 | 4.464293 | 1.60E-08 | 1.87E-06 |
| <a href="#">Col8a1</a>        | 2  | 1.118309 | 5.479979 | 3.52E-06 | 0.00018  |
| <a href="#">Hba-a2</a>        | 2  | 1.100906 | 7.758885 | 0.000842 | 0.014849 |
| <a href="#">Hba-a1</a>        | 2  | 1.115803 | 7.062873 | 0.000699 | 0.012828 |
| <a href="#">Slc39a2</a>       | 2  | -0.59622 | 2.90792  | 0.000218 | 0.005106 |
| <a href="#">Acrbp</a>         | 7  | -0.68757 | 4.000099 | 1.98E-08 | 2.22E-06 |
| <a href="#">4933439C10Rik</a> | 6  | -0.64766 | 3.788055 | 1.48E-07 | 1.29E-05 |
| <a href="#">Zfp414</a>        | 7  | -0.84852 | 4.556946 | 1.14E-15 | 1.20E-12 |
| <a href="#">Crygb</a>         | 1  | 2.789127 | 6.516208 | 0.003685 | 0.044985 |
| <a href="#">Hbb-bt</a>        | 1  | 1.182445 | 5.855703 | 0.000194 | 0.004705 |
| <a href="#">Trim68</a>        | 5  | -0.69068 | 3.148427 | 3.57E-07 | 2.78E-05 |
| <a href="#">Nrbbp2</a>        | 10 | -0.77731 | 5.599613 | 2.72E-11 | 9.43E-09 |
| <a href="#">Dcdc2b</a>        | 3  | -0.80553 | 2.219396 | 5.28E-08 | 4.96E-06 |
| <a href="#">Kcnj13</a>        | 2  | 0.903534 | 3.177849 | 0.00101  | 0.017065 |
| <a href="#">Med12</a>         | 9  | -0.58966 | 6.359936 | 1.24E-08 | 1.59E-06 |
| <a href="#">Pisd-ps1</a>      | 4  | -0.90887 | 3.58509  | 3.75E-05 | 0.001286 |
| <a href="#">Slc2a4rg-ps</a>   | 2  | -0.75541 | 3.643976 | 4.31E-10 | 9.95E-08 |
| <a href="#">Gm15612</a>       | 1  | -0.61731 | 2.743698 | 2.26E-06 | 0.000129 |
| <a href="#">Snhg20</a>        | 7  | -0.65033 | 4.689371 | 1.22E-09 | 2.49E-07 |
| <a href="#">Tgfb3l</a>        | 5  | -0.60764 | 4.757124 | 2.42E-06 | 0.000135 |
| <a href="#">Al480526</a>      | 7  | -0.67029 | 4.876582 | 2.64E-09 | 4.85E-07 |
| <a href="#">Neat1</a>         | 4  | -0.67512 | 5.878173 | 4.89E-09 | 7.73E-07 |
| <a href="#">Gm20507</a>       | 1  | -0.70568 | 2.916329 | 4.36E-08 | 4.19E-06 |
| <a href="#">Mir5125</a>       | 1  | -0.60487 | 2.67326  | 0.00068  | 0.012604 |
| <a href="#">AC149090.1</a>    | 2  | -0.89221 | 7.737431 | 2.17E-07 | 1.77E-05 |
| <a href="#">Gm21750</a>       | 1  | 0.58904  | 2.499844 | 0.000161 | 0.004077 |
| <a href="#">Gm3764</a>        | 11 | -0.60497 | 3.748561 | 3.53E-06 | 0.00018  |
| <a href="#">Gm26852</a>       | 1  | -0.66275 | 2.943725 | 1.55E-06 | 9.40E-05 |
| <a href="#">Mirg</a>          | 12 | -0.819   | 3.098135 | 3.53E-08 | 3.55E-06 |
| <a href="#">Rps6kb2</a>       | 11 | -0.5969  | 3.758842 | 1.16E-05 | 0.000502 |
| <a href="#">Gm10925</a>       | 1  | 0.858512 | 9.612805 | 1.56E-08 | 1.86E-06 |
| <a href="#">Gm28437</a>       | 1  | 1.68546  | 8.010629 | 2.40E-11 | 8.97E-09 |
| <a href="#">Tmem150a</a>      | 5  | -0.66378 | 2.400188 | 1.74E-05 | 0.000686 |

|                               |    |          |          |          |          |
|-------------------------------|----|----------|----------|----------|----------|
| <a href="#">Gm36995</a>       | 1  | -0.84389 | 3.944769 | 6.83E-10 | 1.44E-07 |
| <a href="#">Gm38102</a>       | 2  | -0.63874 | 4.578794 | 1.40E-06 | 8.62E-05 |
| <a href="#">Gm37422</a>       | 1  | -0.61709 | 2.704996 | 3.30E-06 | 0.000173 |
| <a href="#">AY036118</a>      | 1  | 1.306503 | 6.064245 | 5.38E-11 | 1.62E-08 |
| <a href="#">4932422M17Rik</a> | 1  | -0.81136 | 4.489757 | 6.04E-10 | 1.32E-07 |
| CT010467.1                    | 2  | 0.900463 | 9.207282 | 2.10E-07 | 1.73E-05 |
| <a href="#">Map4k2</a>        | 22 | -0.64356 | 4.968698 | 5.76E-09 | 8.21E-07 |
| <a href="#">Gm44597</a>       | 2  | -0.95455 | 3.627414 | 1.64E-10 | 4.17E-08 |
| <a href="#">Gm49320</a>       | 1  | -0.78762 | 3.373718 | 1.02E-05 | 0.000455 |
| <a href="#">Gm35339</a>       | 1  | -0.71245 | 2.827859 | 7.98E-08 | 7.28E-06 |
| <a href="#">Gm49396</a>       | 4  | -0.68409 | 4.700452 | 2.00E-09 | 3.74E-07 |
| <a href="#">Flt3l</a>         | 13 | -0.92132 | 2.724658 | 3.95E-11 | 1.25E-08 |
| <a href="#">Gm48796</a>       | 1  | -0.59281 | 4.134897 | 1.30E-08 | 1.64E-06 |
