# Supplementary material for: Genetic Rescue of X-Linked Retinoschisis Mouse (Rs1−/y) Retina Induces Quiescence of the Retinal Microglial Inflammatory State Following AAV8-RS1 Gene Transfer and Identifies Gene Networks Underlying Retinal Recovery
Source: PubMed Central journal article supplement (PMC8312029; doi:10.1089/hum.2020.213), 2021-07-16
Supplement: Supp_Table7.pdf [file Supp_Table7.pdf]

**Table S 7. Complete List of Significantly Differentially Expressed Gene (DEGs) List. G35 vs. C35 (Rs1-KO-AAV8-RS1 vs. Rs1-KO-AAV8-Null at post injection day 35)**

| Gene                     | Transcript Count | log FC   | log CPM  | P. Value | FDR      |
|--------------------------|------------------|----------|----------|----------|----------|
| <a href="#">Ccnd2</a>    | 8                | 0.875595 | 4.350793 | 0.000636 | 0.040276 |
| <a href="#">S100a4</a>   | 2                | 1.424992 | 3.152079 | 6.58E-05 | 0.009169 |
| <a href="#">Col6a1</a>   | 2                | -0.63213 | 5.704914 | 1.2E-08  | 1.38E-05 |
| <a href="#">Car11</a>    | 5                | -0.73643 | 5.150183 | 1.76E-10 | 3.19E-07 |
| <a href="#">Cavin1</a>   | 2                | 0.615154 | 3.911563 | 0.000327 | 0.025864 |
| <a href="#">Tyr</a>      | 3                | 1.456981 | 3.053254 | 6.93E-07 | 0.000333 |
| <a href="#">Tyrop1</a>   | 4                | 0.99175  | 4.630351 | 0.000578 | 0.037572 |
| <a href="#">Carhsp1</a>  | 1                | 0.815937 | 4.820578 | 6.81E-05 | 0.00928  |
| <a href="#">Gprc5b</a>   | 4                | 0.587076 | 5.992193 | 1.92E-06 | 0.000677 |
| <a href="#">Slc16a12</a> | 1                | 0.885838 | 2.366052 | 0.000418 | 0.030817 |
| <a href="#">Ptgds</a>    | 5                | 0.894975 | 8.268942 | 0.000103 | 0.012154 |
| <a href="#">Cltrn</a>    | 3                | 1.080625 | 2.853902 | 6.95E-06 | 0.001834 |
| <a href="#">Pltp</a>     | 7                | 0.797907 | 4.430455 | 5.41E-05 | 0.007958 |
| <a href="#">Pmp22</a>    | 5                | 0.883077 | 4.792388 | 1.62E-07 | 0.000103 |
| <a href="#">Sparc</a>    | 9                | 0.630827 | 8.189131 | 0.000109 | 0.012725 |
| <a href="#">Dalrd3</a>   | 9                | -0.68202 | 6.485688 | 1.04E-06 | 0.00044  |
| <a href="#">Krt10</a>    | 2                | -0.72697 | 2.892253 | 0.000128 | 0.014117 |
| <a href="#">Perp</a>     | 1                | 1.387551 | 2.718889 | 2.17E-08 | 2.3E-05  |
| <a href="#">Lama2</a>    | 8                | 1.216257 | 3.022615 | 7.84E-05 | 0.010237 |
| <a href="#">Pygl</a>     | 6                | 0.669451 | 4.974679 | 6.75E-05 | 0.00928  |
| <a href="#">Ogn</a>      | 1                | 1.435382 | 3.698257 | 3.54E-09 | 5.61E-06 |
| <a href="#">Rgr</a>      | 6                | 1.286973 | 6.28221  | 0.000659 | 0.041215 |
| <a href="#">Emp2</a>     | 2                | 0.924855 | 3.148185 | 2.09E-05 | 0.003893 |
| <a href="#">Fstl1</a>    | 6                | 0.660788 | 5.822822 | 0.000106 | 0.012436 |
| <a href="#">Slc15a2</a>  | 14               | 0.78564  | 5.831404 | 0.000217 | 0.019967 |
| <a href="#">Clc6</a>     | 2                | 0.827507 | 4.181877 | 0.000116 | 0.01329  |
| <a href="#">P3h3</a>     | 7                | -0.61495 | 5.669111 | 5.38E-07 | 0.000284 |
| <a href="#">Crim1</a>    | 1                | 1.146564 | 6.741473 | 4.4E-08  | 4.28E-05 |
| <a href="#">Vit</a>      | 4                | 1.276832 | 5.171959 | 7.09E-07 | 0.000333 |
| <a href="#">Rgs11</a>    | 11               | -0.64189 | 6.309126 | 1.13E-08 | 1.38E-05 |
| <a href="#">Lama3</a>    | 2                | 0.920276 | 2.951253 | 0.00029  | 0.024188 |
| <a href="#">Pdgfrb</a>   | 2                | 0.666265 | 4.065963 | 0.00022  | 0.020011 |
| <a href="#">Anxa1</a>    | 7                | 1.221052 | 5.642087 | 1.99E-06 | 0.000677 |
| <a href="#">Rdh5</a>     | 7                | 0.890461 | 4.740003 | 0.000592 | 0.038305 |
| <a href="#">Pmel</a>     | 3                | 0.866942 | 4.815687 | 0.000212 | 0.019644 |
| <a href="#">Larp1b</a>   | 15               | 0.840115 | 3.021974 | 0.000343 | 0.02649  |
| <a href="#">Igfbp5</a>   | 2                | 0.735774 | 6.260951 | 0.00029  | 0.024188 |
| <a href="#">Kif26b</a>   | 3                | 0.755174 | 3.872405 | 3.38E-05 | 0.005419 |
| <a href="#">Vim</a>      | 6                | 0.670693 | 7.928247 | 0.000498 | 0.034087 |
| <a href="#">Nek6</a>     | 5                | 0.615461 | 3.712828 | 0.000512 | 0.034316 |

|                           |    |          |          |          |          |
|---------------------------|----|----------|----------|----------|----------|
| <a href="#">Gsn</a>       | 7  | 1.240574 | 4.16846  | 2.03E-06 | 0.000677 |
| <a href="#">Lhx3</a>      | 4  | -0.63962 | 3.692659 | 0.000506 | 0.034166 |
| <a href="#">Neb</a>       | 13 | -0.70642 | 2.522229 | 0.000371 | 0.02853  |
| <a href="#">Dapl1</a>     | 2  | 1.248719 | 5.682816 | 9.66E-07 | 0.000422 |
| <a href="#">Itga6</a>     | 8  | 0.892655 | 4.362032 | 5.08E-05 | 0.007759 |
| <a href="#">Bmp2</a>      | 1  | 0.999934 | 2.397067 | 0.000118 | 0.01329  |
| <a href="#">Bfsp1</a>     | 2  | 3.585823 | 4.949586 | 0.000424 | 0.030871 |
| <a href="#">Fabp5</a>     | 2  | 1.856232 | 5.955337 | 1.11E-07 | 8.81E-05 |
| <a href="#">Mme</a>       | 8  | 1.576769 | 3.439984 | 0.000685 | 0.041438 |
| Hmgcs2                    | 2  | 1.478666 | 3.355062 | 9.42E-07 | 0.000422 |
| <a href="#">Wls</a>       | 7  | 1.390072 | 4.233961 | 8.2E-11  | 2.08E-07 |
| <a href="#">Hspg2</a>     | 3  | 1.862662 | 5.664995 | 0.000535 | 0.035513 |
| <a href="#">Tinagl1</a>   | 9  | 1.362991 | 2.068345 | 7.07E-08 | 5.97E-05 |
| <a href="#">Htra3</a>     | 6  | 1.051466 | 3.124075 | 0.000504 | 0.034166 |
| <a href="#">Fosl2</a>     | 3  | 0.68176  | 3.284625 | 0.000299 | 0.024446 |
| <a href="#">Pdgfra</a>    | 9  | 0.77721  | 4.828766 | 6.81E-08 | 5.97E-05 |
| <a href="#">Fkbp9</a>     | 2  | 0.635686 | 4.551537 | 9.52E-05 | 0.011414 |
| <a href="#">Gpnmb</a>     | 5  | 1.079079 | 5.104554 | 0.000695 | 0.041438 |
| <a href="#">Nupr1</a>     | 6  | 0.963909 | 5.572226 | 0.000692 | 0.041438 |
| <a href="#">Fgfr2</a>     | 27 | 1.313603 | 3.409697 | 1.88E-05 | 0.003646 |
| <a href="#">Col4a6</a>    | 3  | 1.15976  | 3.542001 | 0.000542 | 0.035588 |
| <a href="#">Col4a5</a>    | 4  | 0.895176 | 5.556488 | 0.000145 | 0.015363 |
| <a href="#">Rs1</a>       | 3  | 0.636885 | 6.006876 | 1.54E-05 | 0.00336  |
| <a href="#">Slc7a3</a>    | 7  | -0.79167 | 2.399803 | 0.000221 | 0.020037 |
| <a href="#">Rab11fip1</a> | 6  | 0.717402 | 3.415543 | 0.000331 | 0.025864 |
| <a href="#">Sfrp1</a>     | 1  | 2.031401 | 5.321899 | 9.28E-05 | 0.011414 |
| <a href="#">Slc7a2</a>    | 5  | 0.818782 | 5.725658 | 4.34E-07 | 0.000239 |
| <a href="#">Stra6</a>     | 14 | 0.975416 | 4.421221 | 0.00087  | 0.049493 |
| <a href="#">Frss1</a>     | 6  | 1.116677 | 2.288308 | 1.21E-07 | 8.99E-05 |
| <a href="#">Ucp2</a>      | 11 | 0.832828 | 4.497592 | 0.000135 | 0.014718 |
| <a href="#">Rfc3</a>      | 7  | -0.61773 | 3.231112 | 0.000463 | 0.032243 |
| <a href="#">Loxl2</a>     | 2  | 0.7877   | 3.76915  | 0.000507 | 0.034166 |
| <a href="#">Flvcr2</a>    | 2  | 1.366487 | 2.472938 | 5.43E-05 | 0.007958 |
| <a href="#">Mfrp</a>      | 6  | 1.088587 | 4.902194 | 4.17E-06 | 0.001288 |
| <a href="#">Tle6</a>      | 14 | -0.73089 | 3.984842 | 3.02E-05 | 0.005023 |
| <a href="#">Tle2</a>      | 16 | -0.59711 | 5.34633  | 1.55E-06 | 0.000579 |
| <a href="#">Ror1</a>      | 1  | 0.978777 | 2.418085 | 1.62E-05 | 0.003372 |
| <a href="#">Acta2</a>     | 1  | 1.771043 | 3.239059 | 2.02E-06 | 0.000677 |
| <a href="#">Igfbp7</a>    | 2  | 1.791254 | 6.977775 | 0.000833 | 0.048454 |
| <a href="#">Arsi</a>      | 1  | 1.795087 | 3.079993 | 5.75E-05 | 0.008285 |
| <a href="#">Etl4</a>      | 20 | 0.832018 | 4.69281  | 8.13E-06 | 0.002021 |
| <a href="#">Bend3</a>     | 4  | 0.870262 | 2.86373  | 0.000516 | 0.034443 |
| <a href="#">Asic3</a>     | 5  | -0.66047 | 5.520154 | 9.36E-09 | 1.32E-05 |
| <a href="#">Abhd2</a>     | 2  | 0.62382  | 5.949067 | 7.83E-06 | 0.002014 |

|                            |    |          |          |          |          |
|----------------------------|----|----------|----------|----------|----------|
| <a href="#">Ppl</a>        | 2  | 1.240951 | 3.439982 | 0.000621 | 0.039733 |
| <a href="#">Nhsl1</a>      | 9  | 1.049884 | 3.152184 | 5.46E-05 | 0.007958 |
| <a href="#">Slc26a7</a>    | 4  | 0.961177 | 3.372841 | 1.31E-05 | 0.002966 |
| <a href="#">Slc16a11</a>   | 11 | -0.62284 | 3.465594 | 0.000692 | 0.041438 |
| <a href="#">Fhdc1</a>      | 5  | 1.672539 | 4.033024 | 3.27E-13 | 2.07E-09 |
| <a href="#">Kcnj12</a>     | 3  | 0.616015 | 3.754733 | 0.000286 | 0.024188 |
| <a href="#">Ccdc84</a>     | 12 | -0.62799 | 4.377209 | 1.73E-05 | 0.00353  |
| <a href="#">Aqp5</a>       | 6  | 1.552179 | 2.285866 | 3.04E-06 | 0.000987 |
| <a href="#">Dock5</a>      | 3  | 1.465167 | 4.365629 | 0.000416 | 0.030815 |
| <a href="#">Tent5c</a>     | 3  | 1.707033 | 3.667609 | 3.3E-06  | 0.001045 |
| <a href="#">Erich5</a>     | 1  | 1.370776 | 4.191488 | 3.49E-05 | 0.005524 |
| <a href="#">Cd24a</a>      | 3  | 2.108078 | 6.224945 | 7.8E-05  | 0.010237 |
| <a href="#">Lix1</a>       | 2  | 1.429071 | 3.678766 | 0.000788 | 0.046441 |
| <a href="#">Sox1ot</a>     | 2  | 1.023465 | 2.912549 | 0.00086  | 0.049357 |
| <a href="#">Tmem72</a>     | 2  | 0.699867 | 4.711575 | 0.000459 | 0.032243 |
| <a href="#">Gja1</a>       | 8  | 0.873282 | 5.687688 | 0.000491 | 0.033835 |
| <a href="#">Ezr</a>        | 2  | 0.958629 | 5.150256 | 3.21E-05 | 0.005217 |
| <a href="#">Aldh1a1</a>    | 6  | 0.830474 | 6.380069 | 1.58E-07 | 0.000103 |
| <a href="#">Phgdh</a>      | 4  | 1.168636 | 4.501814 | 4.29E-07 | 0.000239 |
| <a href="#">Shisa6</a>     | 3  | 1.151956 | 3.983161 | 5.83E-12 | 1.85E-08 |
| <a href="#">Maf</a>        | 2  | 0.818348 | 5.001559 | 1.9E-05  | 0.003646 |
| <a href="#">Slc35f3</a>    | 1  | 0.747944 | 2.255037 | 0.000612 | 0.039377 |
| <a href="#">Gstm1</a>      | 4  | 0.794676 | 5.516594 | 0.000297 | 0.02444  |
| <a href="#">Kcnh1</a>      | 3  | 0.677263 | 4.142419 | 2.96E-05 | 0.005023 |
| <a href="#">Tcea2</a>      | 8  | -0.78573 | 3.93262  | 1.04E-05 | 0.002544 |
| <a href="#">Cdh3</a>       | 1  | 0.864262 | 2.256428 | 0.000461 | 0.032243 |
| <a href="#">Ica1</a>       | 12 | -0.60251 | 4.117759 | 0.000398 | 0.030209 |
| <a href="#">Hist2h2aa1</a> | 1  | 0.892648 | 3.410808 | 0.000444 | 0.031783 |
| <a href="#">mt-Co2</a>     | 1  | 0.643013 | 10.01836 | 0.000632 | 0.040268 |
| <a href="#">Col4a4</a>     | 2  | 1.247731 | 5.223459 | 4.69E-06 | 0.001382 |
| <a href="#">Ahnak</a>      | 2  | 0.744111 | 5.794069 | 1.14E-10 | 2.4E-07  |
| <a href="#">Fat1</a>       | 6  | 1.175013 | 5.984619 | 0.000647 | 0.040802 |
| <a href="#">Serpinh1</a>   | 7  | 0.619602 | 4.341833 | 0.000697 | 0.041438 |
| <a href="#">Zscan18</a>    | 6  | -0.58603 | 4.288557 | 0.000158 | 0.016435 |
| <a href="#">Crygb</a>      | 1  | 5.018712 | 6.350948 | 0.000837 | 0.048454 |
| <a href="#">Ccdc61</a>     | 8  | 0.7337   | 2.705953 | 0.000682 | 0.041438 |
| <a href="#">Nynrin</a>     | 3  | 0.75302  | 4.478868 | 4.63E-06 | 0.001382 |
| <a href="#">Ass1</a>       | 4  | 0.603848 | 5.492838 | 1.24E-05 | 0.002857 |
| <a href="#">Cpt1b</a>      | 4  | -1.2609  | 3.605194 | 2.98E-07 | 0.00018  |
| <a href="#">R3hdml</a>     | 1  | 1.775673 | 3.30115  | 0.000162 | 0.016435 |
| <a href="#">Sap25</a>      | 6  | -1.09731 | 2.569563 | 2.33E-05 | 0.004162 |
| <a href="#">Col4a3</a>     | 4  | 1.546554 | 5.359349 | 1.6E-05  | 0.003372 |
| <a href="#">C1qtnf5</a>    | 8  | 0.779707 | 3.105164 | 0.000232 | 0.020594 |
| <a href="#">Gm12895</a>    | 1  | 0.819966 | 7.757375 | 0.000163 | 0.016435 |

|                         |    |          |          |          |          |
|-------------------------|----|----------|----------|----------|----------|
| <a href="#">Gm12896</a> | 1  | 0.819966 | 7.757375 | 0.000163 | 0.016435 |
| <a href="#">Snhg20</a>  | 7  | -0.69686 | 5.60356  | 1.33E-06 | 0.000527 |
| <a href="#">Mir5125</a> | 1  | -1.03786 | 2.826832 | 0.000319 | 0.025754 |
| <a href="#">Gm3764</a>  | 11 | -0.62102 | 4.15238  | 6.58E-05 | 0.009169 |
| <a href="#">Mir6236</a> | 1  | 0.722186 | 11.10446 | 0.000835 | 0.048454 |
| <a href="#">Gm10925</a> | 1  | -1.99534 | 8.445811 | 9.55E-18 | 1.21E-13 |
| <a href="#">Gm28437</a> | 1  | -1.14024 | 9.740975 | 1.29E-07 | 9.07E-05 |
| <a href="#">Gm37904</a> | 1  | -0.76215 | 3.326684 | 0.000174 | 0.017211 |
| <a href="#">Gm36995</a> | 1  | -0.59032 | 3.744142 | 0.000449 | 0.031974 |
| <a href="#">Gm12895</a> | 1  | 0.819966 | 7.757375 | 0.000163 | 0.016435 |
| Gm49396                 | 4  | -0.61916 | 4.594396 | 7.95E-06 | 0.002014 |
| <a href="#">Flt3l</a>   | 13 | -0.67146 | 3.160217 | 0.000676 | 0.041438 |
| <a href="#">Gm38431</a> | 2  | 1.589261 | 2.178895 | 2.92E-12 | 1.23E-08 |
| <a href="#">Gm49327</a> | 3  | -0.70469 | 4.071349 | 6.58E-06 | 0.001774 |
| <a href="#">Col4a6</a>  | 3  | 1.15976  | 3.542001 | 0.000542 | 0.035588 |
