# Supplementary material for: Genetic Rescue of X-Linked Retinoschisis Mouse (Rs1−/y) Retina Induces Quiescence of the Retinal Microglial Inflammatory State Following AAV8-RS1 Gene Transfer and Identifies Gene Networks Underlying Retinal Recovery
Source: PubMed Central journal article supplement (PMC8312029; doi:10.1089/hum.2020.213), 2021-07-16
Supplement: Supp_Table8.pdf [file Supp_Table8.pdf]

**Table S8. Selected list of significantly differentially expressed gene in *Rsl*-KO retina after AAV8-*RS1* gene transfer.**

| Gene symbol | Description                                                 | Mouse Genome Informatics <sup>a</sup> | Log 2-Fold Change <sup>b</sup> | P Value   | Adj P Value <sup>c</sup> |
|-------------|-------------------------------------------------------------|---------------------------------------|--------------------------------|-----------|--------------------------|
|             | <b>Collagens</b>                                            |                                       |                                |           |                          |
| Col5a1      | collagen, type V, alpha 1                                   | <a href="#">MGI:88457</a>             | -0.66                          | 4.10E-07  | 3.11E-05                 |
| Col6a1      | collagen, type VI, alpha 1 MGI:88459                        | <a href="#">MGI:88459</a>             | -1.01                          | 1.77E-23  | 7.49E-20                 |
| Col6a4      | collagen, type VI, alpha 4                                  | <a href="#">MGI:1915803</a>           | -1.05                          | 3.95E-15  | 3.86E-12                 |
| Col7a1      | collagen, type VII, alpha 1                                 | <a href="#">MGI:88462</a>             | -1.41                          | 3.46E-19  | 6.27E-16                 |
| Col11a1     | collagen, type XI, alpha 1                                  | <a href="#">MGI:88446</a>             | -0.71                          | 5.86E-06  | 2.84E-04                 |
| Col11a2     | collagen, type XI, alpha 2                                  | <a href="#">MGI:88447</a>             | -0.93                          | 4.14E-06  | 2.08E-04                 |
| Col17a1     | collagen, type XVII, alpha 1                                | <a href="#">MGI:88450</a>             | -0.66                          | 6.73E-05  | 2.02E-03                 |
| Col20a1     | collagen, type XX, alpha 1                                  | <a href="#">MGI:1920618</a>           | -0.62                          | 2.04E-11  | 7.83E-09                 |
| Col27a1     | collagen, type XXVII, alpha 1                               | <a href="#">MGI:2672118</a>           | -0.75                          | 1.02E-11  | 4.47E-09                 |
|             | <b>Vascular Collagens</b>                                   |                                       |                                |           |                          |
| Col8a1      | collagen, type VIII, alpha 1                                | <a href="#">MGI:88463</a>             | 1.12                           | 3.52E-06  | 1.80E-04                 |
| Col8a2      | collagen, type VIII, alpha 2                                | <a href="#">MGI:88464</a>             | 0.93                           | 1.8E-03   | 2.67E-02                 |
|             | <b>Basement Membrane Components</b>                         |                                       |                                |           |                          |
| Col4a3      | collagen, type IV, alpha 3                                  | <a href="#">MGI:104688</a>            | 1.55                           | 1.60E-05  | 3.37E-04                 |
| Col4a4      | collagen, type IV, alpha 4                                  | <a href="#">MGI:104687</a>            | 1.25                           | 4.69E-06  | 1.38E-03                 |
| Col4a5      | collagen, type IV, alpha 5                                  | <a href="#">MGI:88456</a>             | 0.89                           | 1.45E-04  | 1.54E-03                 |
| Col4a6      | collagen, type IV, alpha 6                                  | <a href="#">MGI:2152695</a>           | 1.16                           | 5.41E-04  | 3.56E-03                 |
| Col6a1      | collagen, type VI, alpha 1                                  | <a href="#">MGI:88459</a>             | -0.63                          | 1.20E-08  | 1.38E-05                 |
| Hspg2       | perlecan (heparan sulfate proteoglycan 2)                   | <a href="#">MGI:96257</a>             | 1.86                           | 5.35E-04  | 3.55E-03                 |
| Lama2       | laminin, alpha 2                                            | <a href="#">MGI:99912</a>             | 1.22                           | 7.84E-05  | 1.02E-03                 |
| Lama3       | laminin alpha3                                              | <a href="#">MGI:99909</a>             | 0.92                           | 2.90E-05  | 2.42E-03                 |
|             | <b>ECM</b>                                                  |                                       |                                |           |                          |
| Bmp2        | bone morphogenetic protein 2                                | <a href="#">MGI:88177</a>             | 1.00                           | 1.18E-04  | 1.32E-03                 |
| Fgfr2       | fibroblast growth factor receptor 2                         | <a href="#">MGI:95523</a>             | 1.31                           | 1.88E-05  | 3.64E-02                 |
| Itga6       | integrin alpha 6                                            | <a href="#">MGI:96605</a>             | 0.89                           | 5.08E-05  | 7.75E-03                 |
| Lox2        | lysyl oxidase-like 2                                        | <a href="#">MGI:2137913</a>           | 0.79                           | 5.07E-04  | 3.41E-03                 |
| Ror1        | receptor tyrosine kinase-like orphan receptor1              | <a href="#">MGI:1347520</a>           | 0.98                           | 1.62E-05  | 3.33E-03                 |
| Serpinh1    | serine (or cysteine) peptidase inhibitor, clade H, member 1 | <a href="#">MGI:88283</a>             | 0.62                           | 6.97E-04  | 4.14E-02                 |
|             | <b>Retinoid Cycle</b>                                       |                                       |                                |           |                          |
| Lrat        | lecithin-retinol acyltransferase(                           | <a href="#">MGI:1891259</a>           | 1.01                           | 1.53E-03  | 2.33E-03                 |
| Rbp1        | retinol binding protein 1, cellular                         | <a href="#">MGI:97876</a>             | 0.61                           | 4.44E-03  | 0.13                     |
| Rdh5        | retinol dehydrogenase 5                                     | <a href="#">MGI:1201412</a>           | 0.97                           | 8.69E-04  | 4.94E-03                 |
| Rpe65       | retinal pigment epithelium 65                               | <a href="#">MGI:98001</a>             | 1.05                           | 1.85E-03  | 2.71E-03                 |
| Stra6       | stimulated by retinoic acid gene 6                          | <a href="#">MGI:107742</a>            | 0.97                           | 8.69E-04  | 4.94E-03                 |
|             | <b>Melanogenesis</b>                                        |                                       |                                |           |                          |
| Dct         | dopachrome tautomerase                                      | <a href="#">MGI:102563</a>            | 0.84                           | 1.22E-05  | 5.15E-04                 |
| Oc2         | oculocutaneous albinism II                                  | <a href="#">MGI:97454</a>             | 0.96                           | 1.11E-04  | 3.03E-03                 |
| Tyr         | tyrosinase                                                  | <a href="#">MGI:98880</a>             | 1.02                           | 7.61E-07  | 5.14E-05                 |
| Tyrp1       | tyrosinase-related protein 1                                | <a href="#">MGI:98881</a>             | 0.87                           | 1.22E-05  | 5.15E-04                 |
|             | <b>Apoptosis</b>                                            |                                       |                                |           |                          |
| Aifm3       | apoptosis-inducing factor, mitochondrion-3                  | <a href="#">MGI:1919418</a>           | -1.02                          | 3.16 E-11 | 1.03E-08                 |
|             | <b>Camera type eye development</b>                          |                                       |                                |           |                          |
| Aqp5        | aquaporin 5                                                 | <a href="#">MGI:106215</a>            | 1.55                           | 3.04E-06  | 9.86E-04                 |
| Aldh1a1     | aldehyde dehydrogenase family 1, A1                         | <a href="#">MGI:1353450</a>           | 0.83                           | 1.58E-07  | 1.03E-04                 |

|         |                                                            |                             |      |          |          |
|---------|------------------------------------------------------------|-----------------------------|------|----------|----------|
| Bfsp1   | beaded filament structural protein 1,in lens               | <a href="#">MGI:101770</a>  | 3.58 | 4.23E-04 | 3.08E-02 |
| Crygb   | crystallin, gamma B                                        | <a href="#">MGI:88522</a>   | 5.01 | 8.37E-04 | 4.84E-02 |
| Fat1    | FAT atypical cadherin 1                                    | <a href="#">MGI:109168</a>  | 1.18 | 6.47E-04 | 4.08E-03 |
| Gjal    | gap junction protein, alpha 1                              | <a href="#">MGI:95713</a>   | 0.87 | 4.91E-04 | 3.38E-02 |
| Maf1    | avian musculoaponeurotic fibrosarcoma oncogene homolog     | <a href="#">MGI:96909</a>   | 0.82 | 1.90E-05 | 3.64E-03 |
| Mfrp    | membrane frizzled-related protein                          | <a href="#">MGI:2385957</a> | 1.09 | 4.17E-06 | 1.28E-02 |
| Pdgfra  | platelet derived growth factor receptor, alpha polypeptide | <a href="#">MGI:97530</a>   | 0.78 | 6.81E-08 | 5.97E-05 |
| Pdgfrb  | platelet derived growth factor receptor, beta polypeptide  | <a href="#">MGI:97531</a>   | 0.67 | 2.19E-04 | 2.00E-02 |
| Vim     | vimentin                                                   | <a href="#">MGI:98932</a>   | 0.67 | 4.97E-04 | 3.40E-02 |
|         | <b>Adhesion</b>                                            |                             |      |          |          |
| Anxa1   | annexin A1                                                 | <a href="#">MGI:96819</a>   | 1.22 | 1.99E-06 | 6.76E-02 |
| Ass1    | argininosuccinate synthetase 1                             | <a href="#">MGI:88090</a>   | 0.60 | 1.24E-05 | 2.85E-03 |
| Cdh3    | cadherin 3                                                 | <a href="#">MGI:88356</a>   | 0.86 | 4.60E-04 | 3.22E-03 |
| Cd24a   | CD24a antigen                                              | <a href="#">MGI:88323</a>   | 2.10 | 7.80E-05 | 1.02E-02 |
| Dock5   | dedicator of cytokinesis 5                                 | <a href="#">MGI:2652871</a> | 1.47 | 4.15E-04 | 3.08E-02 |
| Emp2    | epithelial membrane protein 2                              | <a href="#">MGI:1098726</a> | 0.89 | 5.08E-05 | 7.76E-03 |
| Ezr     | ezrin                                                      | <a href="#">MGI:98931</a>   | 0.96 | 3.21E-05 | 5.21E-03 |
| Gpnmb   | glycoprotein (transmembrane) nmb                           | <a href="#">MGI:1934765</a> | 1.08 | 6.95E-04 | 4.14E-02 |
| Gsn     | gelsolin                                                   | <a href="#">MGI:95851</a>   | 1.24 | 2.03E-06 | 6.76E-04 |
| Itga6   | integrin alpha 6                                           | <a href="#">MGI:96605</a>   | 0.89 | 5.08E-05 | 7.76E-03 |
| Igfbp5  | insulin-like growth factor binding protein 5               | <a href="#">MGI:96440</a>   | 0.74 | 2.92E-04 | 2.41E-03 |
| Igfbp7  | insulin-like growth factor binding protein 7               | <a href="#">MGI:1352480</a> | 1.79 | 8.32E-04 | 4.82E-03 |
| Kif26b  | kinesin family member 26B                                  | <a href="#">MGI:2447076</a> | 0.75 | 3.38E-05 | 5.41E-03 |
| Pdgfra  | platelet derived growth factor receptor, $\alpha$          | <a href="#">MGI:97530</a>   | 0.78 | 6.81E-08 | 5.97E-05 |
| Shisa6  | shisa family member 6                                      | <a href="#">MGI:2685725</a> | 1.15 | 5.83E-12 | 1.85E-08 |
| Sfrp1   | secreted frizzled-related protein 1                        | <a href="#">MGI:892014</a>  | 2.03 | 9.28E-05 | 1.11E-02 |
| Tinagl1 | tubulointerstitial nephritis antigen-like 1                | <a href="#">MGI:2137617</a> | 1.36 | 7.07E-08 | 5.97E-05 |
| Vit     | vitrin                                                     | <a href="#">MGI:1921449</a> | 1.28 | 7.09E-07 | 3.33E-03 |

**a**-MGI-Mouse gene ID; **b**-log2FC-fold change expressed as log2 base; **c**-adj.P.Value: p value adjusted using Benjamini Hochberg method implemented in edgeR
